## 1 **Abstract**

2       Seed dormancy and germination are the two important traits related to plant survival and  
3 reproduction, and crop yield. To understand their regulation mechanism, it is crucial to clarify  
4 which genes or which pathways participate in the regulation of these processes. However, little  
5 information is available during the procedure of seed dormancy and germination in peanut. In this  
6 study, the seeds of the variety Luhua No.14 with non-deep dormancy were selected and its  
7 transcriptional changes at three developmental stages: the fresh-harvest (FS), the after-ripened  
8 (DS) and the just-germinated seeds (GS), were investigated by comparative transcriptomics  
9 analysis. The results showed that genes with increased transcription in DS vs FS comparison were  
10 overrepresented for oxidative phosphorylation, glycolysis pathway and tricarboxylic acid cycle  
11 (TCA), suggesting that after a period of drying storage, the intermediates stored in dry seeds were  
12 rapidly mobilized by glycolysis, TCA cycle, glyoxylate cycle, etc.; the electron transport chain  
13 accompanying with respiration has been reactivated to provide ATP for mobilization of other  
14 reserves and seed germination. In GS vs DS pairwise, dozens of the up-regulated genes were  
15 related to plant hormone biosynthesis and signal transduction, including the majority of  
16 components in auxin signal pathway, and brassinosteroid biosynthesis and signal transduction, and  
17 some GA and ABA signal transduction genes. During seeds germination, the expression of some  
18 *EXPANSIN* and *XYLOGLUCAN ENDOTRANSGLYCOSYLASE* was also significantly enhanced.  
19 To investigate the effect of different hormone during the procedure of seed germination, the  
20 contents and the differential distribution of ABA, GA, BR and IAA in cotyledon, hypocotyl and

21 radicle, and plumule of three seed sections at different developmental stages were also detected.  
22 Combining with previous data in other species, a model of regulatory network related to peanut  
23 seed germination was developed. This model will helpful to gain further understanding of the  
24 mechanisms controlling seed dormancy and germination.

## 25 **Introduction**

26 Seed dormancy and germination are the two important traits in the plant life cycle, which  
27 involve in the survival of a species and the offspring proliferation. Different plant species have  
28 various classes of dormancy to regulate the timing of seed germination, help seedlings emerge  
29 under favorable conditions. Primary dormancy of seeds is acquired during the seed maturation  
30 phase, and reaches a high level in freshly harvested seeds. During subsequent dry period of seeds  
31 (after-ripening), primary dormancy slowly reduces. When the dormancy level gradually decreases,  
32 seeds can rapidly loose dormancy and proceed to germination during imbibition at favorable  
33 conditions [1]. A recent research in *Arabidopsis* suggested that seed after-ripening is a specific  
34 developmental pathway that is independent of germination potential and doesn't rely on ABA  
35 regulation [2]. The dormancy alleviation in dry seeds is associated with ROS production and the  
36 carbonylation of specific embryo proteins [3-5]. Concomitantly, the metabolic switches between  
37 different developmental periods of seeds are also relevant to the distinct expression profiles of  
38 genes involved in several metabolism pathways [6].

39 Strictly defined, germination is the initial emergence of the radicle from the seed coat. In  
40 some species, like as *Arabidopsis*, whose embryo is enclosed by the endosperm and the

41 surrounding testa, seed germination consists of two visible steps: first, the testa rupture due to  
42 expansion of the endosperm and embryo, followed by the radicle protruding through the  
43 endosperm. However, in leguminous plants, seed is endospermless, and testa splitting marks the  
44 completing germination [7-9]. Phytohormones play the important roles in the induction and the  
45 maintenance of seed dormancy, as well as the release of dormancy and the following germination.  
46 Abscisic acid (ABA) and gibberellins (GA) negatively and positively regulate seed germination.  
47 In different development states of seed, the ratio between ABA and GA in embryo is changeable.  
48 The dormant seeds maintain a high ABA/GA ratio, and dormancy maintenance also depends on  
49 high ABA/GA ratios, while dormancy release involves a net shift to increased GA biosynthesis  
50 and ABA degradation resulting in low ABA/GA ratios, and seed germination associated with the  
51 increasing of GA content and sensitivity [7,10]. The basic role of auxin is to promote cell  
52 elongation. Increasing of GA content leads to the obvious change in auxin content and transport  
53 during seed germination. A peak of free IAA appears prior to the initiation of radicle elongation  
54 [11]. Brassinosteroid (BR), as another antagonist of ABA, and GA play the parallel roles to  
55 promote cell elongation and germination. Photodormancy is released by the GA/light signal  
56 transduction pathway, while the subsequent endosperm rupture is activated by the BR and the  
57 GA/light pathways with distinct mechanisms [11-13].

58 In recent years, many studies have focused on gene expression analyses related to seed  
59 dormancy and germination, and have revealed some genes that regulate seed dormancy and  
60 germination, especially genes involved in phytohormone signaling such as ABA, GA, BR and  
61 IAA pathways [9,14-22]. Many transcriptome analyses involved in seed dormancy and

62 germination in different plants describe a global view of gene expression changes among different  
63 developmental stages, or at different region of seeds, or in dormant and non-dormant seeds [15,  
64 23-25]. Bassel et al. (2011) indicated that the characters of seed dormancy and germination are  
65 much conservative in evolution of flowering plants. The genome-wide transcriptional analyses of  
66 dormant and after-ripened *Arabidopsis* seeds over four time points and two seed compartments  
67 found that the gene sets strongly enhanced at the initiation of imbibition are overrepresented for  
68 GO classes including key cellular metabolic processes like translation, amino acid, organic acid,  
69 nucleotide and carbohydrate metabolism, and the down-regulated sets includes response to stress  
70 and other environmental cues [15]. During germination of soybean seeds, GA, ethylene and BR  
71 pathways are transcriptionally active, while ABA signalling is down-regulated in the embryonic  
72 axes [26].

73 Cultivated peanut (*Arachis hypogaea* L.) is a distinctive oilseeds crop, which flowers on the  
74 ground and fructifies under the ground. After peanut maturity, harvest delayed may cause *in situ*  
75 germination of seeds when they meet constant rainy days, always leading to a depression in yield  
76 and a reduction in seed quality. The species *A. hypogaea* L. has been divided into two subspecies:  
77 *A. hypogaea subsp. hypogaea* and *A. hypogaea subsp. fastigiata*. In the subspecies *A. hypogaea*  
78 *subsp. hypogaea var. hypogaea* (Virginia and Runner market types) and *var. hirsuta*, varieties  
79 have longer growth cycle and seeds have longer dormancy stage. While in subspecies *fastigiata*  
80 involving *var. fastigiata* (Valencia market class) and *var. vulgaris* (Spanish market type), varieties  
81 are early-maturing but generally lack fresh seed dormancy [27]. However, even the *subsp.*  
82 *hypogaea* with dormancy, their dormant status is easy to be broken during storing for a short time

83 at room temperature. In our present research, in order to explore the regulatory mechanism of  
84 dormancy release and germination of peanut seeds, the seeds of the variety Luhua No.14 (LH14)  
85 belonging to *subsp. hypogaea* with non-deep dormancy of seeds were selected and its  
86 transcriptional changes at three developmental stages: the fresh-harvest, the after-ripened and the  
87 just-germinated seeds, were investigated by comparative transcriptomics analysis.

## 88 **Materials and Methods**

### 89 **Plant Material and Growth Conditions**

90 Peanut variety LH14 bred by Shandong Peanut Research Institute, and planted by our group  
91 in the field located at Yinmaqun Farm for subsequent assay and analysis. The seeds were  
92 harvested from the field and divided into two parts, one portion of them harvested freshly was  
93 kept in paper bags under -80°C or under ambient temperature and humidity, and another part  
94 designation as after-ripened seeds was dried in sunshine for over two weeks and kept in paper  
95 bags under room temperature. For the assay of germination rate, 5 accessions [2 from *subsp.*  
96 *fastigiata*: chico (CHI) and Silihong (SLH); 3 from *subsp. hypogaea*: LH14, Fenghua No.1 (FH1)  
97 and Linguimake (LGMK)] were selected. Thirty six seeds from each accession were sowed in  
98 three petri dishes over four layers of absorbent gauze wetted with demineralized water and  
99 incubated in 15°C incubator with darkness. The status of imbibition was determined at 24 h  
100 intervals based on the changes of seed swelling, and seeds were considered germinated when the  
101 radicles broke through seed coat.

### 102 **RNA Extraction, Library Construction and Sequencing**

103 The whole seeds from fresh harvest (FS), after ripened (DS), and germinated exactly (GS)  
104 were collected for RNA extraction. Two biological repeats were set up. Total RNA of the samples  
105 was isolated using the improved CTAB method [28], and was treated with DNase I (RNase-free)  
106 according to the TaKaRa's protocol. Their quantity and purity was measured using Qubit® RNA  
107 Assay Kit in Qubit® 2.0 Fluorometer (Life Technologies, CA, USA) and the NanoPhotometer®  
108 spectrophotometer (IMPLEN, CA, USA), and the integrity was examined with the RNA Nano  
109 6000 Assay Kit of the Bioanalyzer 2100 system (Agilent Technologies, CA, USA).

110 A total amount of 3µg RNA each sample was used to construct cDNA library. The libraries  
111 were generated using NEBNext® Ultra™ RNA Library Prep Kit for Illumina® (NEB, USA)  
112 following manufacturer's recommendations. Sequencing for 6 libraries was completed by Beijing  
113 Novogene Bioinformatics Technology Co., Ltd. on a HiSeq 2000 platform (Illumina, San Diego,  
114 CA, USA), and 100 bp paired-end reads were generated.

## 115 **Data Analysis for RNA-Seq**

116 The raw data of fastq format were cleaned by removing adapter sequences, reads containing  
117 poly-N, and low-quality reads ( $Q \leq 20$ ). The clean reads were aligned to the reference genome  
118 (*Arachis ipaensis*, <https://www.peanutbase.org/home>) using TopHat v2.0.12. All sequence data  
119 (Bioproject\_accession:PRJNA545858) were submitted to the BioProject database of the National  
120 Center for Biotechnology Information (NCBI). The expression levels were calculated with  
121 Cufflinks and normalized by the Fragments Per Kilobase of transcript per Millions mapped reads  
122 (FPKM) method [29].

123 The differentially expressed genes (DEGs) between the two samples were detected by DESeq  
124 R package (ver. 1. 18. 0) and  $P$  value were adjusted using the Benjamini and Hochberg method for  
125 control of the false discovery rate [30]. Genes with an adjusted  $P < 0.05$  were used as the  
126 thresholds to determine significant differences in gene expression. Annotation of gene function  
127 was performed by comparisons with non-redundant nucleotide and protein sequences (NCBI), and  
128 protein sequence database Swiss-Prot. The GO (Gene Ontology) and KEGG (Kyoto  
129 Encyclopedia of Genes and Genomes) enrichment analyses were performed to identify which  
130 DEGs were significantly enriched in GO terms or metabolic pathways by the Goseq R package  
131 and the KOBAS software. GO terms with corrected  $P$  value less than 0.05 were considered  
132 significantly enriched by differential expressed genes. The GO annotations were functionally  
133 classified by WEGO software for gene function distributions. The genes with at least twice level  
134 of expression in specific developmental stage than that in other stage were defined as preferential  
135 DEGs in KEGG pathways referenced by soybean.

## 136 **Real-time Quantitative RT-PCR (qRT-PCR) Analysis**

137 DEGs preferentially expressed in specific metabolism pathway and hormone signal pathways  
138 were selected for validation using real-time qRT-PCR. The candidate genes and their  
139 amplification primers were listed in Table 1. The qRT-PCR was performed by the instruction of  
140 SYBR Premix Ex Taq (Tli RNaseH Plus; Takara Biotechnology, Dalian, China). The reaction  
141 condition was: predenaturing for 5 min at 94°C, and then 40 cycles of 15 s at 94°C and 30 s at  
142 60°C. The relative expression levels of the target genes were analyzed with *AhACTIN7* as an  
143 internal control and calculated using the  $2^{-\Delta\Delta C_t}$  method [31].

144 **Table 1. The primers using for verification of gene expression level by qRT-PCR**

| Gene ID     | Forward Primer          | Reverse Primer           | Annotation/ Abbreviation                                            | Pathway        |
|-------------|-------------------------|--------------------------|---------------------------------------------------------------------|----------------|
| Aradu.7JD6C | CCTGATGTAGTGGGATCATTTCG | GCCACTGGAGCCATTCTAAA     | NADH-ubiquinone oxidoreductase chain 1/ MT-ND1                      | OP/complex I   |
| Aradu.FMP57 | CGACGAGTACACTAAGGAGAGA  | TGGGCTGAAGTGACTTGATATG   | Succinate dehydrogenase [ubiquinone] iron-sulfur subunit 2 / SDH2-2 | OP/complex II  |
| Aradu.77KSP | CGATTCGTCGTGGTCATCAA    | GCCGTCAACTACCTCAATCTC    | Cytochrome c1-1, heme protein/ CYCL                                 | OP/complex III |
| Aradu.UQR72 | CCTTTCCATGAAGCACGAGTA   | AGGAATGGTGCGTTGATATAGG   | Cytochrome b-c1 complex subunit 7-1/ QCR7-1                         | OP/complex III |
| Aradu.BDB6C | CCACGTTGGAAGGACATCATA   | GCCAAATACCTCCGATCTCTAC   | Cytochrome c oxidase subunit 3/ COX3                                | OP/complex IV  |
| Aradu.4B6K6 | GGTGA CTCTCCAGTGTTAATG  | CCTTAGCCTTCTCACCCAATATG  | ATP synthase subunit gamma/ ATPC                                    | OP/complex V   |
| Aradu.71QRQ | CTACCTGCCATCTCTGCATTTA  | CCAACCTCTTCACCCATCAA     | Pyruvate dehydrogenase E1 component subunit beta-1/ PDH-E1          | GG             |
| Aradu.HH99D | CCGAGGTCACAGGAAGTAATG   | GCTGGTATCCAGGCAAGAAA     | Formate dehydrogenase/ FDH                                          | TCA            |
| Aradu.8XX6M | CTGTCATGGGCCAGAATCTT    | CTCGTTCAACGGTCTCATCTAC   | 6-phosphogluconate dehydrogenase, decarboxylating 3/6-PGDH          | GG             |
| Aradu.H3G7C | CTCCTTCTCTTCCCATCAATC   | CTTCCATATAACCCTCGTCATCTC | Isocitrate dehydrogenase [NADP]/ IDH                                | TCA            |
| Aradu.RB3TY | CCAAGTGGAGTTCAGCTAAGAG  | CGAAATCTGCAGCTCTGTCTAT   | 2-oxoglutarate dehydrogenase/ OGDH                                  | TCA            |



|             |                        |                         |                                                                           |     |
|-------------|------------------------|-------------------------|---------------------------------------------------------------------------|-----|
| Aradu.52T5J | CTTGCTCAAGGGCCTCAAT    | TTCCTCCACACCGTCTTTTC    | Malate dehydrogenase/ MDH                                                 | TCA |
| Aradu.U0HC6 | AGAAGAGTAAGAGCAGCGAAAC | CAATCGCTATCCCGTCCATATT  | Auxin-responsive protein<br>IAA13/ IAA13                                  | AuS |
| Aradu.06HW9 | CCTCTTCTCACTCTCCACTCT  | GCTCTGCAAGACAACGATTTG   | Auxin efflux carrier component<br>2/ PIN2                                 | AuS |
| Aradu.PZ2UH | GGGAAAGCTCAGGAAGGAAA   | CTCTCGGCTCTGATCTTGAATC  | Auxin response factor 3/ ARF3                                             | AuS |
| Aradu.MF3XQ | AGGCAGGATCTGTAGGAAGA   | GTGTCATTCAAGCAGACCATCTA | Auxin response factor 5/ ARF5                                             | AuS |
| Aradu.FVI2X | CCTTAGATGGGTCATGGAGAAA | GAAGAGTGGGTGTTGAAGTA    | Auxin-responsive protein<br>SAUR32/ SAUR32                                | AuS |
| Aradu.DSS3T | AAAGTGGGTGGATGGCTATG   | GTAGTGACCCTGAATGACAAAGA | Expansin-A11/ EXPA11                                                      | -   |
| Aradu.V7R7T | CTGGAACTATGGGAGGTTCTTG | AGCTGAAGCCATCGTTGTATAG  | Expansin-A3/ EXPA3                                                        | -   |
| Aradu.R6HZB | TAGCACCAGAGCCTTTCAATC  | CTTGATTCTTCAACGCGAACAG  | Expansin-like A1/ EXLA1                                                   | -   |
| Aradu.OQC7R | GGATTACGCAAACAATGGAG   | GTCACCTGGAACTCAAGAAGA   | Expansin-like B1/ EXLB1                                                   | -   |
| Aradu.4I7WA | CCACCAAGAAGTCCACACTTA  | GGGAAAGGAACCCATAGATT    | Xyloglucan<br>endotransglucosylase/hydrolase<br>2/ XTHL2                  | -   |
| Aradu.AA5UH | CAACAGCCTATGGAACGCAG   | CGGAGGTTTACAGCCATCA     | Probable xyloglucan<br>endotransglucosylase/hydrolase<br>protein B/ XTHLB | -   |

145 **OP: oxidative phosphorylation; GG: glycolysis; TCA: tricarboxylic acid cycle; AuS: Auxin**  
 146 **signaling**

## 147 **Hormones Extraction and Quantification**

148 1g of samples were ground with a mortar and pestle in liquid nitrogen, and extracted in cold

149 80% (v/v) methanol with butylated hydroxytoluene (1 mmol·L<sup>-1</sup>) overnight at 4°C. The extracts

150 were collected after centrifugation at 10000g for 20 min at 4°C, and purified through a C<sub>18</sub>  
151 Sep-Park Cartridge (Waters Crop., Millford, MA) and dried in N<sub>2</sub>. The hormone fractions were  
152 dissolved in phosphate buffer saline (PBS, 0.01 mol·L<sup>-1</sup>, pH7.4) with 0.1% (v/v) Tween 20 and  
153 0.1% (w/v) gelatin for determining the levels of hormones by ELISA.

154 The peanut seeds were dissected into three parts: cotyledon (CO), hypocotyl and radicle  
155 (HR), and the remainder plumule (PL). The contents of ABA, GA<sub>3</sub>, IAA and BR in these three  
156 parts were detected by ELISA according to the method reported by Yang et al. [32]. The  
157 monoclonal antibodies against ABA, GA<sub>3</sub>, IAA and BR produced by the Phytohormones Research  
158 Insitute, China Agricultural University, were used as the first antibody, and IgG horseradish  
159 peroxidase was the secondary antibody. The content of each hormone was calculated by known  
160 amounts of standard hormone added in the extracts according to description by Weiler et al. [33].

## 161 **Results**

### 162 **Germination Assay**

163 Five accessions including LH14, FH1, LGMK, CHI and SLH, which divided into two classes  
164 of non-deep dormant and non-dormant, were selected for the detection of germination rate. To  
165 explore the influence of dried storage on seed germination, the germination assay of the  
166 fresh-harvest seeds and dry seeds stored for more than two weeks were performed. It was found  
167 that the fresh-harvested seeds of LH14, FH1 and LGMK with non-deep dormancy began to  
168 germinate after sowing in water for 4d and their germination rates only reached 75%, 77.8%, and  
169 91.7% during imbibiting for more than 10d; and then after a period of dried storage, their

170 majorities of dried seeds started to germinate after uptaking water for 2d and their germination  
171 rates reached 100%, 97.2%, and 97.2% after germinated for 4~6d; while in non-dormant peanut  
172 seeds from CHI and SLH, there were no obvious difference in the beginning time of germination  
173 between the fresh-harvested seeds and the dry seeds, their seeds began to germinate at the second  
174 day, but the uniformity of seeds germination in the dry seeds was much higher than that in the  
175 fresh-harvested seeds (Fig 1). It was suggested that non-deep dormant peanut seeds released the  
176 dormancy through the process of after-ripening by dried storage, whereas non-dormant peanut  
177 seeds were short of the typical after-ripening procedure. Thus, peanut variety LH14 with non-deep  
178 dormancy was selected using for the following experiments.

179 **Fig 1. The germination rate of peanut seeds of fresh-harvest (F) and after drying (D) from**  
180 **different varieties LH14: Luhua No. 14, FH1: Fenghua No. 1, LGMK: Lingguimake, CHI:**  
181 **Chico, SLH: Silihong**

## 182 **Transcriptome Sequencing and Assessment**

183 In order to investigate the changes of transcript profile in LH14 seeds among fresh harvested  
184 (FS), after ripened (DS), and just-germinated stage (GS), the RNA-seqs of the six samples from  
185 three stages were performed by Illumina sequencing. In total, 44.5 to 63.4 million raw reads from  
186 the six libraries with an error rate of approximately 0.03% were generated, and the 44.1 ~ 62.7  
187 million of clean reads generated by removing low-quality sequences were selected for further  
188 analysis (Table 2). Among which, 81.11 ~ 85% of reads were mapped to the reference genome  
189 (*Arachis duranensis*, <https://www.peanutbase.org/> home), and the reads uniquely mapped account  
190 for 78.34 ~ 82.63%. The percentages of reads mapped into exon, intron, and intergenic region  
191 were 83.1 ~ 87.5%, 1.3 ~ 3.6%, and 11.1 ~ 15.1%, respectively.

192 **Table 2. Summary of the transcriptome sequencing data**

| Sample_name     | FS_1                 | FS_2                 | DS_1                 | DS_2                 | GS_1                 | GS_2                 |
|-----------------|----------------------|----------------------|----------------------|----------------------|----------------------|----------------------|
| Raw Reads       | 59931664             | 44502832             | 56994704             | 63409368             | 50687486             | 51665824             |
| Clean reads     | 59307780             | 44076312             | 56410796             | 62736078             | 50126196             | 50974284             |
| Q30 (%)         | 93.56                | 93.72                | 93.70                | 93.46                | 93.18                | 91.92                |
| Total mapped    | 48105991<br>(81.11%) | 36147297<br>(82.01%) | 45822510<br>(81.23%) | 50745769<br>(80.89%) | 42171822<br>(84.13%) | 43329793<br>(85%)    |
| Uniquely mapped | 46684962<br>(78.72%) | 35267221<br>(80.01%) | 44419221<br>(78.74%) | 49145234<br>(78.34%) | 40939147<br>(81.67%) | 42120239<br>(82.63%) |
| Exon            | 83.7%                | 87.5%                | 85.5%                | 84.5%                | 83.1%                | 83.1%                |
| Intron          | 1.3%                 | 1.4%                 | 1.8%                 | 2.6%                 | 3.1%                 | 3.6%                 |
| Intergenic      | 15.1%                | 11.1%                | 12.7%                | 12.8%                | 13.9%                | 13.2%                |

## 193 **Analysis of Differentially Expressed Genes (DEGs) at**

### 194 **Different Stages**

195 To investigate the major genes controlling dormancy release and germination of peanut seeds,  
196 the analyses of DEGs in the three sample pairs (DS vs FS, GS vs FS, and GS vs DS) were  
197 performed. A total of 3440, 2295, and 4657 DEGs were identified in above comparative pairs,  
198 respectively. There are 2169 up-regulated genes, and 1271 down-regulated genes between the  
199 after-ripened and the fresh-harvested seeds, and 1056 up-regulated and 1239 down-regulated ones  
200 between the just-germinated and the fresh-harvested seeds. Between the just-germinated and the  
201 after-ripened period, there are much more DEGs than those in other two comparisons, among

202 them, the expression level of 2200 genes increased, and 2457 genes decreased. Of the total 5425  
203 up-regulated and 4967 down-regulated DEGs, only 65 and 63 DEGs shared commonly across the  
204 three stages, and about 288, 728 and 65 enhanced DEGs, and 391, 629 and 63 reduced DEGs  
205 respectively overlapped in different combination of sample pairs, and 1881 and 880, 282 and 105,  
206 as well as 1472 and 1828 up-regulated and down-regulated genes were specifically found in DS vs  
207 FS, GS vs FS, and GS vs DS comparisons (Fig 2). It is interesting that between just-germinated  
208 seeds and fresh-harvest seeds, the morphologic changes were much obvious, while the number of  
209 DEGs was the fewest across the three pairwise.

210 **Fig 2. Venn diagrams of differentially expressed genes (DEGs) among fresh-harvest seeds**  
211 **(FS), dried seeds (DS), and just-germinated seeds (GS). Red counts represent up-regulated**  
212 **and blue counts are down-regulated between different comparisons.**

## 213 **GO Functional Classification of DEGs at Different Stages**

214 The Analysis of GO was performed to explore the biological processes related to dormancy  
215 release and germination of peanut kernels. In DS vs FS, the up-regulated DEGs were significantly  
216 enriched in 21 GO terms (corrected  $p < 0.05$ ), in which the top seven terms were oxidation-  
217 reduction process (GO: 0055114, 241 genes), single-organism biosynthetic process (GO: 0044711,  
218 177 genes), organonitrogen compound metabolic process (GO: 1901564, 227 genes), cofactor  
219 metabolic process (GO: 0051186, 78 genes), small molecule metabolic process (GO: 0044281,  
220 163 genes), pigment metabolic process (GO:0042440, 46 genes), and isoprenoid biosynthetic  
221 process (GO: 0008299, 23genes), while there were no down-regulated DEGs markedly enriched in  
222 GO terms. In this comparison pair, the majorities of the improved DEGs focused on the molecular

223 function of oxidoreductase activity (Fig 3A). Compared GS to FS, only the down-regulated DEGs  
224 were grouped into one GO term, that is the embryo development process (GO: 0009790), in which  
225 7 genes out of 20 genes located in the reference genome was detected (Fig 3B). In GS vs DS, the  
226 up-regulated DEGs were remarkably enriched in 19 GO terms, which involve in several biological  
227 regulation and cellular process including regulation of gene expression (GO:0010468, 184 genes),  
228 regulation of RNA biosynthetic process (GO:2001141, 177 genes ), protein phosphorylation  
229 (GO:0006468, 138 genes), cellular protein modification process (GO:0006464, 183 genes), and so  
230 on, and among them, the crucial parts mainly execute the following molecular functions including  
231 nucleic acid binding transcription factor activity, ubiquitin-protein transferase activity, and so on  
232 (Fig 3A). In this comparative pairwise, the down-regulated DEGs mainly grouped in 11 GO terms,  
233 among which the majorities were detected in the upregulated DEGs of DS vs FS, including  
234 oxidation-reduction process (GO: 0055114, 291 genes), single-organism biosynthetic process  
235 (GO: 0044711, 201genes), pigment metabolic process (GO: 0042440, 51genes), cofactor  
236 metabolic process (GO: 0051186, 83 genes), and etc., and other enrichment terms related to  
237 metabolic process, mainly including carbohydrate derivative metabolic process (GO:1901135, 125  
238 genes) and carbohydrate metabolic process (GO: 0005975, 161 genes) (Fig 3B).

239 **Fig 3. The histogram of DEGs functional classification between DS and FS, GS and DS, and**  
240 **GS and FS using GO annotation. A. The classification of up-regulated DEGs; B. The**  
241 **classification of down-regulated DEGs**

## 242 **Rapidly Reactivation of Energy Metabolism during**

## 243 **After-ripening**

244 A large number of enzymes and mRNAs involved in the major metabolic pathways including  
245 energy production pathways store in matured dry seeds, preparing for germination of seeds and  
246 seedling establishment [34-37]. During a period of dry storage, which seeds undergo the period of  
247 after-ripening, seed dormancy is gradually alleviated [35]. In our study, the KEGG  
248 pathway analysis showed that during the after ripening of peanut seeds, many genes involved in  
249 oxidative phosphorylation (S1 Table, gmx00190, 48/243 genes, corrected  $p=2.48e-05$ ), glutathione  
250 metabolism (gmx00480, 28/155 genes, corrected  $p=0.015$ ), and carbon metabolism (S2 Table,  
251 gmx 01200, 59/447 genes, corrected  $p=0.021$ ), were significantly increased.

252 Mitochondria is the important place where respiration takes place, during which electrons are  
253 transferred from electron donors to acceptors to produce reactive oxygen species such as  
254 superoxide  $O_2^-$  and hydrogen peroxide  $H_2O_2$ , and the energy in the way of adenosine triphosphate  
255 (ATP) are released [38]. In our study, during the after-ripening of peanut seeds, the enzymes  
256 encoded by the up-regulated crucial DEGs significantly associated with the complexes I to V  
257 of the electron transport chain in oxidative phosphorylation, including NADH dehydrogenase (ND)  
258 subunit 1, 2, 4, 4L, 5 and 6, and NADH dehydrogenase (ubiquinone) iron-sulfur (Ndufs) subunit 1,  
259 2, 7, 8 and flavoprotein 2 (Ndufv2) from complex I (NADH-coenzyme Q oxidoreductase),  
260 succinate dehydrogenase (ubiquinone) iron-sulfur subunit 2 (SDHB2) from complex II  
261 (succinate-Q oxidoreductase), ubiquinol-cytochrome c reductase iron-sulfur subunit (ISP), and  
262 cytochrome b subunit (Cytb), cytochrome c1 subunit (Cyt1) and ubiquinol-cytochrome c reductase  
263 subunit 7 (QCR7) from complex III (cytochrome bc1 complex), cytochrome c oxidase (COX)  
264 subunit 1, 2 and 3 from complex IV, and the different kind of ATPase from complex V (F-type

265 H<sup>+</sup>-transporting ATPase subunit $\alpha$ , subunit a, b and g, V-type H<sup>+</sup>-transporting ATPase subunit B,  
266 D, E, G, H and 21kDa proteolipid subunit) (Figs 4A and 4B, S1 Table). The qRT-PCR results also  
267 verified that the expression of some key genes involved in complexes I to V of the electron  
268 transport chain increased at dry seed stage (Fig 5A).

269 **Fig 4. Differences of gene expression between DS and FS stage in several metabolic pathway.**

270 **A. The majority of up-regulated genes represented in the KEGG pathway involved in**  
271 **glycolysis, tricarboxylic acid cycle (TCA), glyoxylate cycle, ASP and ALA metabolism, and**  
272 **oxidative phosphorylation. (1) Invertase; (2) Hexokinase (HK); (3) Glucose-6-phosphate**  
273 **dehydrogenase (G6PDH); (4) Pyrophosphate-dependent phosphofructokinase (PFP) /**  
274 **Diphosphate-fructose-6-phosphate1-phosphotransferase;(5) Phosphofructokinase (PFK); (6)**  
275 **Fructose-biphosphate aldolase (FBA); (7) Pyruvate kinase(PK); (8) Pyruvate dehydrogenase**  
276 **complex; (9) Citrate synthase (CSY); (10) Citrate hydro-lyase and Citrate hydrooxymutase;**  
277 **(11)Isocitrate dehydrogenase (IDH); (12) 2-oxoglutarate dehydrogenase (OGDH); (13)**  
278 **Succinyl-CoA:acetate CoA transferase/SSA-CoA synthetase; (14) Succinate dehydrogenase**  
279 **(SDH); (15) Fumarate hydratase; (16) Malate dehydrogenase (MDHm); (17) Isocitrate lyase**  
280 **(ICL); (18) Malate synthase (MSY); (19) Aspartate aminotransferase (AspAT); (20) Malate**  
281 **dehydrogenase (MDHc); (21) NAD-dependent malic enzyme 2 (NAD-ME2); (22) Alanine**  
282 **aminotransferase (AlaAT). The numbers in parentheses marked in red color represent the**  
283 **up-regulated genes encoding the key enzymes in related pathway. B. Heatmaps of the 59**  
284 **DEGs among FS, DS and GS stage in oxidative phosphorylation pathway; C. Heatmaps of**  
285 **the 59 DEGs among FS, DS and GS stage in carbon metabolic pathway**



286 **Fig 5. Analysis of mRNA transcription level of several DEGs between DS and FS stage by**  
287 **real-time fluorescent quantitative RT-PCR. A. The DEGs related to the electron**  
288 **transferring chain in oxidative phosphorylation pathway; B. The DEGs involved in**  
289 **dehydrogenation reaction in glycolysis and TCA**

290 The reserves such as starch, lipid, and protein stored in plant seeds, act as the source of  
291 carbon and nitrogen, which are degraded and mobilized during filial germination and seedling  
292 establishment [39]. Except for these reserves, lots of metabolites including sugars, organic acids,  
293 polyols, amino acids, and some fatty acid-related compounds are accumulated in maturation seeds,  
294 which also as the energy storage, could provide certain metabolites rapidly to recover the  
295 corresponding metabolic pathways before mobilization of storage reserves [6]. Our results of  
296 KEGG pathway analysis showed that mobilization of some metabolites is rapidly promoted during  
297 the after-ripening of peanut seeds with the shorter period of dormancy. Lots of genes associated  
298 with glycolysis, tricarboxylic acid (TCA) cycle (also named as citrate cycle), and glyoxylate cycle  
299 were significantly up-regulated during this stage (Fig 4, S2 Table). Among them, twenty-one  
300 genes encoding different dehydrogenase, including pyruvate dehydrogenase complex, isocitrate  
301 dehydrogenase (IDH), 2-oxoglutarate dehydrogenase, succinate dehydrogenase, and malate  
302 dehydrogenase (MDH), and etc., account for 1/3 of up-regulated genes, which by a series of  
303 oxidation reaction of intermediates in glycolysis pathway and TCA cycle, catalyze one pyruvate  
304 molecule to produce CO<sub>2</sub>, one molecule of ATP, and four NADH and one FADH<sub>2</sub> molecules [40].  
305 Six genes out of them had been confirmed to be up-regulated in dry seeds by qRT-PCR (Fig 5B).  
306 TCA cycle also could oxidize the intermediates of amino acids by a transamination reaction [41].

307 In cotyledons of soybean and pea, aspartate aminotransferase participate in this catabolic reaction  
308 to generate an intermediate of TCA [26]. The transcriptional level of four genes encoding  
309 aminotransferase (Aspartate aminotransferase and Alanine aminotransferase 2 from mitochondria,  
310 Serine-glyoxylate aminotransferase, and Phosphoserine aminotransferase 1 from chloroplast) was  
311 remarkably elevated in our results (Figs 4A and 4C, S2 Table). The resulting NADHs and FADH<sub>2</sub>  
312 molecules enter into electron transport chain and are further oxidated to produce energy by  
313 oxidative phosphorylation. Total 12 ATP molecules are generated by TCA cycle [41]. In addition,  
314 expression of several genes encoding glyceraldehyde-3-phosphate dehydrogenase also improved,  
315 which catalyze the oxidation and phosphorylation of glyceraldehyde-3-phosphate to produce  
316 1,3-bisphospho-D-glycerate in glycolysis.

317 Therefore, after a period of storage, the intermediates stored in peanut dry seeds are rapidly  
318 mobilized by glycolysis, TCA cycle, and glyoxylate cycle, and some transamination process; and  
319 the electron transport chain accompanying with respiration has been reactivated to provide ATP  
320 for mobilization of other reserves and seed germination. During this period, ROSs as by-product  
321 also accumulated in seeds, which are considered to associate with the status transformation from  
322 dormancy to non-dormancy [4, 5].

## 323 **Multiple Pathways of Plant Hormone Signal Transduction** 324 **during Seed Germination**

325 During germination of peanut seeds, some down-regulated genes were classified into  
326 oxidative phosphorylation pathway (41 genes, corrected  $p=0.0025$ ), and dozens of the up-regulated  
327 genes were related to plant hormone biosynthesis and signal transduction (Figs 4B and 6A, S1 and

328 S3Tables). Indole-3-acetic acid biosynthesis is the necessary trigger for seed germination [6]. The  
329 majority of components in auxin signal pathway, including auxin transporter-like protein AUX1  
330 which is an auxin influx carrier, the F-box protein TRANSPORT INHIBITOR RESPONSE 1  
331 (TIR1), AUXIN RESPONSE FACTOR (ARF), probable indole-3-acetic acid-amido synthetase  
332 GH3, SAUR family protein, and AUX/IAA family proteins, were significantly improved in this  
333 period. By qRT-PCR, the expression level of several crucial genes related to IAA signaling also  
334 had been confirmed to be induced in germinated seeds (Fig 7A). Lots of genes involved in  
335 brassinosteroid biosynthesis and signal transduction were also markedly increased, such as  
336 cytochrome P450 90B1 and 90A1, steroid 5-alpha-reductase DET2, brassinosteroid receptor BRI1  
337 (brassinosteroid insensitive 1), BRI1-associated receptor kinase BAK1, and brassinosteroid  
338 resistant BZR1 and BRZ2; while one *BIN2* gene was down-regulated significantly. In addition, the  
339 up-regulated genes also included some GA and ABA signal transduction genes, for example,  
340 gibberellin receptor GID1 (GA-insensitive dwarf 1), F-box protein GID2, abscisic acid receptor  
341 PYR/PYL, protein phosphatase 2C (PP2C), and serine/threonine-protein kinase SnRK2 (S3  
342 Table).

343 **Fig 6. The signaling pathway of phytohormone including GA, BR, auxin, and so on is**  
344 **enhanced in the germinated seeds. A. Heatmaps of the 42 DEGs among FS, DS and GS stage**  
345 **in phytohormone signaling pathway B. Heatmaps of the 15 DEGs among FS, DS and GS**  
346 **stage in protein ubiquitin degradation pathway**

347 **Fig 7. Analysis of mRNA transcription level of several DEGs between GS and DS stage by**  
348 **real-time fluorescent quantitative RT-PCR. A. The DEGs involved in auxin signal**  
349 **transduction pathway; B. The DEGs related with cell elongation and cell wall remodeling**

350 Ubiquitin-mediated proteolysis plays an important regulatory role in hormone signaling [42],  
351 during which the proteins are polyubiquitinated by a reaction cascade that consist of three

352 enzymes, named E1 (ubiquitin activating enzyme), E2 (ubiquitin conjugating enzyme), and E3  
353 (ubiquitin ligase), and are degraded by 26s proteasome. Our research found that some genes  
354 encoding E1, E2, and E3 were significantly improved during seed germination, which include  
355 ubiquitin-like 1-activating enzyme E1 A (UBLE1A), ubiquitin conjugating enzyme (UBE2C,  
356 UBE2D, UBE2I, and UBE2O), and Cullin (Cul1), adaptor protein Skp1 (S-phase  
357 kinase-associated protein 1) belonging to SCF complex of multi subunit RING-finger type E3, and  
358 so on (S4 Table, Fig 6B).

## 359 **The Distribution and Content of Hormones in Different** 360 **Stages of Seed**

361 Phytohormone plays an important role in determining the physiological state of the seed and  
362 in regulating the germination process [11,37]. Therefore, in order to understand the crucial roles of  
363 different hormones in seed dormancy, dormancy release and germination. The contents of ABA,  
364 GA, BR and IAA in different developmental stages of seed were detected, and the whole seed was  
365 divided into three parts (CO, HR and PL) for exploring the differential distribution of hormones.

366 ABA is a positive regulator of dormancy induction and a negative regulator of germination,  
367 while GA counteracted with ABA release dormancy and promoter germination. Our detection  
368 results found that ABA contents in every part of fresh-harvest seeds displayed higher level, and  
369 ABA level decreased in the HR part of dried seeds, while significantly increased in the CO and PL  
370 part. ABA contents in CO and PL rapidly declined during the early phase of seed imbibitions, and  
371 kept in a constant level after imbibition for 28h, while ABA content in HR slightly rose during the  
372 early stage, and began to decrease after 28h. In fact, seeds of imbibition for 28h and 52h have

373 lower ABA level (47.48 and 52.74 ng/g.FW). GA<sub>3</sub> levels in HR of all development stages, from  
374 10.53 ng/g.FW to 14.94 ng/g.FW, were much higher than those in CO and PL, that was lowest in  
375 dried seeds, and was highest in imbibition seeds for 4h and dropt with the duration of germination  
376 time. In CO, GA<sub>3</sub> content decreased accompanying water loss to dried seeds, and also maintained  
377 a lower level in imbibition for 4h, and then increased with the prolongation of imbibition time and  
378 reached the top level in imbibition for 28h, and then slightly reduced. In PL, there was the highest  
379 GA<sub>3</sub> content in dried seeds, and during the procedure of germination, GA<sub>3</sub> contents kept the lower  
380 level (Fig 8A). Previous researches indicated that it is likely that the ABA: GA ratio, and not the  
381 absolute hormone amounts, regulates dormancy release and germination. Dormancy maintenance  
382 depends on higher ABA: GA ratio, while dormancy release involves a net shift to increased GA  
383 biosynthesis and ABA degradation resulting in lower ABA: GA ratio [7, 11]. Therefore, the ABA:  
384 GA ratios in three seed parts of all development periods were assessed. The results showed that  
385 low ABA: GA ratios were maintained at all stages in HR, while in PL, high ABA: GA ratios  
386 except for at dried seeds; and in CO, ABA: GA ratio in dried seeds was much higher than those in  
387 other periods, and with the duration of germination, ABA: GA ratios sharply dropped from 71.08  
388 to 3.82 (Fig 8A).

389 **Fig 8. The phytohormone contents of different section from peanut seeds at different**  
390 **developmental stages. A. ABA and GA content, and the ratio of ABA to GA in**  
391 **fresh-harvested seeds, dried seeds, and the seeds during imbibition for 4, 28 and 52hr; B. BR**  
392 **and IAA content in fresh-harvested seeds, dried seeds, and the seeds during imbibition for 4,**  
393 **28 and 52hr. HR: hypocotyl and radicle; PL: Plumule; CO: Cotyledon**

394 BR and GA as the positive regulators, counteract the inhibitory action of ABA, promote cell  
395 elongation and seed germination in parallel way [11]. Our results found that in CO and PL, BR

396 contents slightly changed during seed germination, while in HR, BR level was lowest in dried  
397 seed, and then enhanced significantly when seed began to suck up water, and reached the peak in  
398 imbibitions for 28h following a distinct decrease (Fig 8B).

399 By now, very little is known about the role of auxin during seed germination. However, some  
400 studies found that auxin maybe interact with GA and resulting in the change of IAA synthesis and  
401 transport during germination [11,43]. Our detection results found that in any part of dried seeds,  
402 the IAA contents were much lower; and then during imbibiting for 4h to 28h, IAA kept the lowest  
403 level in HR, while sharply rose up and went down in PL; and the accumulation of IAA enhanced  
404 in HR and PL with the duration of imbibition time. In CO, IAA level significantly increased at  
405 early stage of water uptake, and then dropped down little by little till imbibition for 52h (Fig 8B).

## 406 **Discussion**

### 407 **Dormancy Alleviation of LH14 Dry Seeds Associated with** 408 **the Rapid Resumption of Multiple Metabolic Processes** 409 **during After-ripening**

410 Seed dormancy is established during seed maturation, and dormancy loss of matured seeds  
411 can take place through a period of dry storage (so-called as AR), through moist chilling, or  
412 through seed coat scarification. Different species or same species living in variant natural habitats  
413 evolve to have different dormancy adaption for environmental conditions. For instance, Landsberg  
414 *erecta* (Ler) or Columbia (Col) ecotype of Arabidopsis have a low level of dormancy, while the  
415 seeds of Cape Verde Islands (Cvi) ecotype show a strong dormancy [10]. AR is a specific

416 developmental procedure, which broaden or increase sensitivity of perception of seeds to  
417 environmental conditions for promoting germination, and simultaneously decrease or narrow  
418 sensitivity of perception in repressing germination [7,44]. The duration time of AR procedure is  
419 much different among different species, some go through several days, and others last for several  
420 months or more [10,15,25]. Although after-ripened seeds have been provided with germination  
421 ability, their germination must meet appropriate environment including suitable temperature,  
422 humidity, and etc., or else seeds will reenter the second dormancy. Physiological status of dry  
423 seeds seems to be quiescent, however, abundant changes in gene expression have been found in  
424 dry seeds compared to those in dormant seeds, which trigger by AR [45-47]. It was shown that  
425 some genes associated with storage mobilization, cell wall modification were highly expressed in  
426 after-ripened seeds to dormant seeds of Arabidopsis and wheat [45,46]. Although transcriptional  
427 profiles and molecular mechanism underlying dormancy release by AR are conserved between  
428 species, there are their own unique regulatory mechanisms in different species [46,48]. In this  
429 study, seeds of LH14 display the obvious AR period during dry storage despite easily losing their  
430 dormancy. The results of transcriptomic analysis of dormant and AR peanut seeds indicated that  
431 lots of genes (3440 genes) were differentially expressed, of which the majority involved in  
432 multiple metabolic processes including the oxidative phosphorylation, carbohydrate metabolism,  
433 and glutathione metabolism modules. After-ripened seeds with dormancy have made the necessary  
434 preparation for germination and seedling establishment, in which the mobilization of reserves and  
435 energy production plays the crucial roles. Acetyl- CoA, producing through a transacylation  
436 reaction in glycolysis, is central for energy metabolism, which is oxidized via TCA cycle in

437 mitochondria, and in glyoxysome, which also is an intermediate in the conversion of fatty acids to  
438 carbohydrates [26,49]. TCA cycle also could oxidize the intermediates of amino acids by a  
439 transamination reaction [26,41]. In peanut dry seeds, we found that large amounts of key genes  
440 associated with glycolysis, TCA and glyoxylate cycles, and amino acid metabolism, were highly  
441 transcribed. It was suggested that the stored soluble carbohydrates, fatty acids, amino acids and  
442 other intermediates could be rapidly utilized by resuming of several metabolic pathways, and an  
443 early activation of oxidative phosphorylation by electron transport chain could produce large  
444 amounts of ATP to supply the following procedure. Some studies in soybean, Arabidopsis and  
445 sugarbeet indicated that glycolysis, fermentation, TCA glyoxylate cycles and the oxidative  
446 pentose phosphate pathway (OPPP) are quickly activated by AR upon imbibitions to supply  
447 energy for germination [15,26,34,37]. Therefore, in fact like peanut dry seeds, several catalytic  
448 procedures involved in energy metabolism might be rapidly resumed during AR of dry seeds in  
449 other dicot species; merely peanut dry seeds with non-deep dormancy are more sensitive to AR.  
450 The key genes corresponding to these pathways maybe still express in a higher level during the  
451 early phase of peanut seed germination, while majority of them display the down-regulated  
452 expression patterns during the later period of germination and testa breaking.

## 453 **Coordination of Hormone Signal Transduction Nets Plays a** 454 **Key Role in Radicle Protrusion**

455 During the period of radicle protrusion, breakage of seed testa and hypocotyl elongation is  
456 the major visible characters. Various phytohormones and environment signals take part in the  
457 regulation of this procedure.



458           The antagonistic effects of GA and ABA on seed dormancy breakage and germination have  
459    been clarified in many monocot and dicot species [1,7,10,11,50,51]. During the procedures of seed  
460    maturation, inception and maintenance of dormancy, dormancy release, and seed germination, the  
461    contents of ABA and GA in seeds, and the sensitivity of seeds to them, have much complex  
462    dynamic relationships. Although GA accumulation correlates with dormancy release and  
463    germination, GA treatment alone apparently does not satisfy the conditions of seed germination. A  
464    reduction in ABA levels is prerequisite before GA contents and sensitivity begin to increase [50].  
465    In fact, maintaining of dormancy requires a higher ABA: GA ratio, while dormancy breakage and  
466    germination depends on the conversion of increasing GA biosynthesis and ABA degradation  
467    resulting in lower ABA: GA ratio [7,11,50]. In the present study, we found that the amount of  
468    ABA in cotyledon sharply dropped down at the onset of dry seeds sucking water, and maintained  
469    relative constant level during the late phase of imbibition; while GA level kept to increase after  
470    sowing in water for 4h, and hold on steady level after imbibition for 28h. Clearly, prior to the  
471    enhancing of GA content, the ABA content has dropped to a lower level, and the resulting lower  
472    ABA: GA ratio in peanut cotyledon is beneficial for the radicle breaking through testa. We didn't  
473    found any genes involved in GA synthesis remarkably improved in germinated seeds, but found  
474    that four significant up-regulated genes participated in GA signal transduction, two of them  
475    encode GA receptor GID1 and others encode F-box protein GID2 which is the major component  
476    of the SCF<sup>SLY1/GID2</sup> ubiquitin E3 ligase complex. However, during this period, the expression of a  
477    *DELLA* gene (gmx:547719), repressing GA signal transduction cascade, was significantly  
478    down-regulated. In GA signaling module, GA, receptor GID1 together with repressor DELLA

479 form a GA-GID1-DELLA complex. When bioactive GA level raises, GID1 combining with GA  
480 occurs the conformational change, and DELLA is recruited to the SCF<sup>SLY1/GID2</sup> ubiquitin E3 ligase  
481 complex for poly-ubiquitination and subsequent degradation by the 26S proteasome, relieving the  
482 suppressive effects on downstream GA-responsive genes [20,52]. We also found some genes  
483 involved in ubiquitin mediated proteolysis pathway are markedly up-regulated in germinated  
484 seeds; out of them included one gene encoding the SCF ubiquitin ligase complex protein. It is  
485 implied that the sensitivity of GA perception maybe increase on the initial of radicle emergence.  
486 Furthermore, GA triggers seed germination by removing the mechanical restraint of the seed coat  
487 and endosperm, during which the expression of some expansin (EXP) and and *xyloglucan*  
488 *endotransglycosylases* (XETs/XTHs) family members are induced [37,50,53-56]. Our results  
489 indicated that the expression levels of eight peanut *EXP* genes [including five *α-expansin* (*EXPA*),  
490 one *expansin-like A* (*EXPLA*), and two *expansin-like B* (*EXPLB*)] and six *XTH* genes significantly  
491 up-regulated at the stage of seed germination compared to those in dry seeds (Fig. 7B).

492 Both GA and BR stimulate seed germination by different regulatory mechanism [50,57,58].  
493 Although both GA and BR can induce the expression of cell elongation- or cell wall  
494 organization-related genes including *EXPs*, but these hormones promote the expression of distinct  
495 family members. BR is considered to promote seed germination by directly improving the growth  
496 potential of embryo in a GA-independent manner [50,58]. When BR content is high, BR is  
497 perceived and bound by BRI1, and activated BRI1/BAK1 kinase complex, and thereby the  
498 downstream repressors of BR signaling, including the GSK3-like kinase BIN2, are inhibited; the  
499 inhibition of BIN2 results in the accumulation of unphosphorylated BZR1/2 family transcription

500 factors that regulate BR-target gene expression [12,59-62].In the present study, the expression  
501 levels of some transcripts associated with positively regulating BR biosynthesis and signaling  
502 pathway were remarkably up-regulated during germination of peanut seeds, those include *DET2*,  
503 *BRI1*, *BAK1*, *BRZI*, and so on; while one kinase *BIN2* gene (gmx:100802451), negatively  
504 regulating BR signal transduction, was markedly down-regulated. In the meanwhile, we found that  
505 the significant increase of BR levels only took place in the hypocotyls and radicles of imbibed  
506 peanut seeds. It is suggested that the elevation of BR content in the HR section of peanut imbibed  
507 embryo was rapidly perceived by *BRI1*, and the BR signal transduction cascade was subsequently  
508 initiated, resulting some genes required for cell elongation were activated in the imbibed  
509 hypocotyls and radicles until seed germination finished. This is consistent with the conclusion that  
510 increase of BR signaling intensity improves the status of seed germination, and increases the  
511 length of hypocotyls [60,63,64].

512 Auxin is a major hormone associated with plant morphogenesis, which is also essential for  
513 promoting hypocotyl elongation and seed germination [64-67]. The SCF<sup>TIR1</sup> –auxin – AUX/IAA  
514 complex is the central component of Auxin signaling model, in which auxin triggers  
515 ubiquitination and degradation of the AUX/IAA family proteins to derepress the inhibition of  
516 ARF transcription factors, and subsequently to promote the expression of some auxin-responsive  
517 genes [68]. In this study, at the radicle protrusion time point, the expressions of a large number of  
518 genes involving auxin signal transduction (*AUX1*, *TIR1*, *CULLIN*, *AUX/IAAs*, *ARFs*, *GH3*,  
519 *SAUR*) were substantially increased; the transcription levels of two *PIN2* genes (encoding auxin  
520 efflux carrier) were also significantly produced. While at this time, no obvious expression changes

521 were observed in genes specifying for auxin biosynthesis. Taken together, it was implied that  
522 during the later stage of peanut seeds germination, auxin transport is active and the auxin signaling  
523 pathway plays the important regulatory roles. Auxin distribution in Arabidopsis young seedlings is  
524 imbalance, a higher level in root apex and cotyledon; and its polar transport associates with root  
525 morphogenesis and gravitropism, inhibiting auxin transport results in aberration of root  
526 gravitropism and elongation [69,70]. We found that during the earlier stage of imbibitions, IAA  
527 content in CO and PL section of peanut seeds rapidly increased up to a higher level, especially in  
528 PL section, while in HR section it kept constant level until approaching germination, and then  
529 started to rise slowly, indicating that the increase of IAA level maybe relate to the elongation of  
530 embryo axis (HR section) during germination.

531 BR- and auxin-mediated cell elongation is interdependent, and this synergism doesn't depend  
532 on the level of hormone biosynthesis [67]. The crosstalk of auxin and BR signals is found to  
533 converge on the regulation of ARF transcription factors, which is downstream from BZR1 and  
534 AUX/IAA proteins and trigger the expression of some auxin-response genes with ARFAT motif  
535 (TATCTC) in the promoters [65,67]. Walcher and Nemhauser (2012) found that BZR2 and ARF5  
536 could bind to the 5'flanking region of *SAUR15* gene that is activated by both auxin and BR [71].  
537 Oh et al., recently clarified a central regulation cassette in regulating hypocotyl cell elongation that  
538 auxin, BR, GA, light, and temperature signals were integrated together. In this module, BZR1 and  
539 light-responsive factor PIF4 co-regulate hypocotyl cell elongation by interacting with specific  
540 ARFs such as ARF6, ARF8 and etc. However, GA signaling pathway in regulating cell elongation  
541 is converged through removing the DELLA proteins inhibition to specific ARFs, together with

542 BZR1 and PIF4, to promote the expression of some ARF target genes [64]. At the germination  
543 time-point of peanut seeds, the homologous genes of Arabidopsis *ARF3*, *ARF5*, *ARF8*, *ARF18* and  
544 *ARF32* were significantly expressed up-regulatedly. However, among them, which is the central  
545 one or ones in integrating auxin signal with BR and GA signals? It needs to verify by experiments.  
546 Several studies indicated that seed germination procedure involve in the regulation of cell  
547 expansion and cell wall organization, during which the expression levels of some *XTHs* and *EXPs*  
548 genes improve remarkably[37,53-56,65,71]. Recent studies found the 5'flanking region of some  
549 *XTHs*, *EXPs* and other auxin-responsive genes including *IAA*s, *SAUR*s and *GH3*s contain the  
550 TGTCTC or its inverse element GAGACA that is the binding site of some ARFs [64,65,67,71].  
551 Our results also found that lots of genes mentioned above expressed at a high level in  
552 just-germinated seeds, suggesting that some specific ARFs together with other transcription  
553 factors regulating cooperatively by GA, BR, auxin, and other signals modulate the ARF target  
554 gene expression and promote breakage of peanut seed testa and hypocotyl elongation (Fig. 9).

555 **Fig 9. Model sketch of coordinating effects of hormone GA, BR and auxin signaling on**  
556 **hypocotyl elongation and radicle protrusion**

## 557 **Supporting Information**

558 **S1 Table** DEGs in OP pathway

559 **S2 Table** DEGs in CM pathway

560 **S3 Table** DEGs in phytohormone signaling pathway

561 **S4 Table** DEGs in UB pathway

## 562 **Author Contributions**

563 LS, ZL, SW designed the experiments and contributed to the writing of the manuscript. PX, GT,  
564 WC, JZ performed the qRT-PCR verification and the detection of phtohormone. GC, CM  
565 performed bioinformatic analysis. LS, PL drew the diagram of metabolic pathways. All authors  
566 revised the draft and approved the final manuscript.

## 567 **References**

- 568 1. Graeber K, Nakabayashi K, Miatton E, Leubner-Metzger G, Soppe WJ. Molecular  
569 mechanisms of seed dormancy. *Plant Cell Environ* 2012; 35: 1769-1786.  
570 doi:10.1111/j.1365-3040.2012.02542.x PMID:22620982
- 571 2. Carrera E, Holman T, Medhurst A, Dietrich D, Footitt S, Theodoulou FL, et al. Seed  
572 after-ripening is a discrete developmental pathway associated with specific gene networks in  
573 Arabidopsis. *Plant J* 2008; 53: 214-224. doi:10.1111/j.1365-313X.2007.03331.x  
574 PMID:18028281
- 575 3. Job C, Rajjou L, Lovigny Y, Belghazi M, Job D. Patterns of protein oxidation in Arabidopsis  
576 seeds and during germination. *Plant Physiol* 2005; 138: 790-802. doi:10.1104/pp.105.062778  
577 PMID:15908592
- 578 4. Oracz K, El-Maarouf Bouteau H, Farrant JM, Cooper K, Belghazi M, Job C, et al. ROS  
579 production and protein oxidation as a novel mechanism for seed dormancy alleviation. *Plant J*  
580 2007; 50: 452-465. doi:10.1111/j.1365-313X.2007.03063.x PMID:17376157
- 581 5. Muller K, Carstens AC, Linkies A, Torres MA, Leubner-Metzger G. The NADPH-oxidase  
582 AtrbohB plays a role in Arabidopsis seed after-ripening. *New Phytol* 2009; 184: 885-897.  
583 doi:10.1111/j.1469-8137.2009.03005.x PMID:19761445
- 584 6. Fait A, Angelovici R, Less H, Ohad I, Urbanczyk-Wochniak E, Fernie AR, et al.  
585 Arabidopsis seed development and germination is associated with temporally distinct  
586 metabolic switches. *Plant Physiol* 2006; 142: 839-854. doi:10.1104/pp.106.086694  
587 PMID:16963520
- 588 7. Finch-Savage WE, Leubner-Metzger G. Seed dormancy and the control of germination. *New*  
589 *Phytol* 2006; 171: 501-523. doi:10.1111/j.1469-8137.2006.01787.x PMID:16866955
- 590 8. Muller K, Tintelnot S, Leubner-Metzger G. Endosperm-limited Brassicaceae seed  
591 germination: abscisic acid inhibits embryo-induced endosperm weakening of *Lepidium*  
592 *sativum* (cress) and endosperm rupture of cress and *Arabidopsis thaliana*. *Plant Cell Physiol*  
593 2006; 47: 864-877. doi:10.1093/pcp/pcj059 PMID:16705010
- 594 9. Xi W, Liu C, Hou X, Yu H. MOTHER OF FT AND TFL1 regulates seed germination  
595 through a negative feedback loop modulating ABA signaling in Arabidopsis. *Plant Cell* 2010;  
596 22: 1733-1748. doi:10.1105/tpc.109.073072 PMID:20551347
- 597 10. Ali-Rachedi S, Bouinot D, Wagner MH, Bonnet M, Sotta B, Grappin P, et al. Changes in  
598 endogenous abscisic acid levels during dormancy release and maintenance of mature seeds:

- 599 studies with the Cape Verde Islands ecotype, the dormant model of *Arabidopsis thaliana*.  
600 *Planta* 2004; 219: 479-488. doi:10.1007/s00425-004-1251-4
- 601 11. Kucera B, Cohn MA, Leubner-Metzger G. Plant hormone interactions during seed  
602 dormancy release and germination. *Seed Science Research* 2005; 15: 281-307.  
603 doi:10.1079/ssr2005218
- 604 12. Hu Y, Yu D. BRASSINOSTEROID INSENSITIVE2 interacts with ABSCISIC ACID  
605 INSENSITIVE5 to mediate the antagonism of brassinosteroids to abscisic acid during seed  
606 germination in *Arabidopsis*. *Plant Cell* 2014; 26: 4394-4408. doi:10.1105/tpc.114.130849  
607 PMID:25415975
- 608 13. Wei T, He Z, Tan X, Liu X, Yuan X, Luo Y, et al. An integrated RNA-Seq and network  
609 study reveals a complex regulation process of rice embryo during seed germination. *Biochem*  
610 *Biophys Res Commun* 2015; 464: 176-181. doi:10.1016/j.bbrc.2015.06.110 PMID:26116530
- 611 14. Chen YT, Liu H, Stone S, Callis J. ABA and the ubiquitin E3 ligase KEEP ON GOING  
612 affect proteolysis of the *Arabidopsis thaliana* transcription factors ABF1 and ABF3. *Plant J*  
613 2013; 75: 965-976. doi:10.1111/tpj.12259 PMID:23742014
- 614 15. Dekkers BJ, Pearce SP, van Bolderen-Veldkamp RP, Holdsworth MJ, Bentsink L. Dormant  
615 and after-Ripened *Arabidopsis thaliana* Seeds are Distinguished by Early Transcriptional  
616 Differences in the Imbibed State. *Front Plant Sci* 2016; 7: 1323. doi:10.3389/fpls.2016.01323  
617 PMID:27625677
- 618 16. Lopez-Molina L, Mongrand S, Kinoshita N, Chua NH. AFP is a novel negative regulator of  
619 ABA signaling that promotes ABI5 protein degradation. *Genes Dev* 2003; 17: 410-418.  
620 doi:10.1101/gad.1055803 PMID:12569131
- 621 17. Matakadiadis T, Alboresi A, Jikumaru Y, Tatematsu K, Pichon O, Renou JP, et al. The  
622 *Arabidopsis* abscisic acid catabolic gene CYP707A2 plays a key role in nitrate control of  
623 seed dormancy. *Plant Physiol* 2009; 149: 949-960. doi:10.1104/pp.108.126938  
624 PMID:19074630
- 625 18. Nelson SK, Ariizumi T, Steber CM. Biology in the Dry Seed: Transcriptome Changes  
626 Associated with Dry Seed Dormancy and Dormancy Loss in the *Arabidopsis* GA-Insensitive  
627 *sleepy1-2* Mutant. *Front Plant Sci* 2017; 8: 2158. doi:10.3389/fpls.2017.02158  
628 PMID:29312402
- 629 19. Shu K, Zhang H, Wang S, Chen M, Wu Y, Tang S, et al. ABI4 regulates primary seed  
630 dormancy by regulating the biogenesis of abscisic acid and gibberellins in *Arabidopsis*. *PLoS*  
631 *Genet* 2013; 9: e1003577. doi:10.1371/journal.pgen.1003577 PMID:23818868
- 632 20. Sun TP. The molecular mechanism and evolution of the GA-GID1-DELLA signaling module  
633 in plants. *Curr Biol* 2011; 21: R338-345. doi:10.1016/j.cub.2011.02.036 PMID:21549956
- 634 21. Wang Z, Ji H, Yuan B, Wang S, Su C, Yao B, et al. ABA signalling is fine-tuned by  
635 antagonistic HAB1 variants. *Nat Commun* 2015; 6: 8138. doi:10.1038/ncomms9138  
636 PMID:26419884
- 637 22. Zhang X, Garretton V, Chua NH. The AIP2 E3 ligase acts as a novel negative regulator of  
638 ABA signaling by promoting ABI3 degradation. *Genes Dev* 2005; 19: 1532-1543.  
639 doi:10.1101/gad.1318705 PMID:15998807
- 640 23. Bassel GW, Lan H, Glaab E, Gibbs DJ, Gerjets T, Krasnogor N, et al. Genome-wide  
641 network model capturing seed germination reveals coordinated regulation of plant cellular



- 642 phase transitions. *Proc Natl Acad Sci U S A* 2011; 108: 9709-9714.  
643 doi:10.1073/pnas.1100958108 PMID:21593420
- 644 24. Cao D, Xu H, Zhao Y, Deng X, Liu Y, Soppe WJ, et al. Transcriptome and Degradome  
645 Sequencing Reveals Dormancy Mechanisms of *Cunninghamia lanceolata* Seeds. *Plant*  
646 *Physiol* 2016; 172: 2347-2362. doi:10.1104/pp.16.00384 PMID:27760880
- 647 25. Dekkers BJ, Pearce S, van Bolderen-Veldkamp RP, Marshall A, Widera P, Gilbert J, et al.  
648 Transcriptional dynamics of two seed compartments with opposing roles in *Arabidopsis* seed  
649 germination. *Plant Physiol* 2013; 163: 205-215. doi:10.1104/pp.113.223511 PMID:23858430
- 650 26. Bellieny-Rabelo D, De Oliveira EA, Ribeiro ES, Costa EP, Oliveira AE, Venancio TM.  
651 Transcriptome analysis uncovers key regulatory and metabolic aspects of soybean embryonic  
652 axes during germination. *Sci Rep* 2016; 6: 36009. doi:10.1038/srep36009 PMID:27824062
- 653 27. Issa F, Daniel F, Jean-Francois R, Hodo-Abolo T, Ndoeye SM, Tahir DA, et al. Inheritance of  
654 fresh seed dormancy in Spanish-type peanut (*Arachis hypogaea* L.): bias introduced by  
655 inadvertent selfed flowers as revealed by microsatellite markers control. *Afr. J. Biotechnol.*  
656 2010; 9: 1905-1910. doi:10.5897/AJB09.1321
- 657 28. Chen G, Shan L, Zhou LX, Tang GY, Bi YP. The Comparison of Different Methods for  
658 Isolating Total RNA from Peanuts. *Chinese Agricultural Science Bulletin* 2011;  
659 27(1):214-218.(In Chinese)
- 660 29. Trapnell C, Williams BA, Pertea G, Mortazavi A, Kwan G, van Baren MJ, et al. Transcript  
661 assembly and quantification by RNA-seq reveals unannotated transcripts and isoform  
662 switching during cell differentiation. *Nat. Biotechnol.* 2010; 28: 511-515.  
663 doi:10.1038/nbt.1621 PMID:20436464
- 664 30. Benjamini Y, Hochberg Y. Controlling the false discovery rate: a practical and powerful  
665 approach to multiple testing. *J R STAT SOC B* 1995; 57:289-300.
- 666 31. Livak KJ, Schmittgen TD. Analysis of relative gene expression data using real-time  
667 quantitative PCR and the 2(-Delta Delta C(T)) Method. *Methods* 2001; 25: 402-408.  
668 doi:10.1006/meth.2001.1262 PMID:11846609
- 669 32. Yang J, Zhang J, Wang Z, Zhu Q, Wang W. Hormonal changes in the grains of rice subjected  
670 to water stress during grain filling. *Plant Physiol* 2001; 127: 315-323. PMID:11553759
- 671 33. Weiler EW, Jourdan PS, Conrad W. Levels of indole-3-acetic acid in intact and decapitated  
672 coleoptiles as determined by a specific and highly sensitive solid-phase enzyme  
673 immunoassay. *Planta* 1981; 153: 561-571. doi:10.1007/BF00385542 PMID:24275876
- 674 34. Catusse J, Strub JM, Job C, Van Dorsselaer A, Job D. Proteome-wide characterization of  
675 sugarbeet seed vigor and its tissue specific expression. *Proc Natl Acad Sci U S A* 2008; 105:  
676 10262-10267. doi:10.1073/pnas.0800585105 PMID:18635686
- 677 35. Holdsworth MJ, Bentsink L, Soppe WJ. Molecular networks regulating *Arabidopsis* seed  
678 maturation, after-ripening, dormancy and germination. *New Phytol* 2008; 179: 33-54.  
679 doi:10.1111/j.1469-8137.2008.02437.x PMID:18422904
- 680 36. Rajjou L, Gallardo K, Debeaujon I, Vandekerckhove J, Job C, Job D. The effect of  
681 alpha-amanitin on the *Arabidopsis* seed proteome highlights the distinct roles of stored and  
682 neosynthesized mRNAs during germination. *Plant Physiol* 2004; 134: 1598-1613.  
683 doi:10.1104/pp.103.036293 PMID:15047896



- 684 37. Weitbrecht K, Muller K, Leubner-Metzger G. First off the mark: early seed germination. *J*  
685 *Exp Bot* 2011; 62: 3289-3309. doi:10.1093/jxb/err030 PMID:21430292
- 686 38. Boyer PD, Cross RL, Momsen W. A New Concept for Energy Coupling in Oxidative  
687 Phosphorylation Based on a Molecular Explanation of the Oxygen Exchange Reaction. *Proc*  
688 *Nat Acad Sci USA* 1973; 70: 2837-2839.
- 689 39. Penfield S, Graham S, Graham IA. Storage reserve mobilization in germinating oilseeds:  
690 *Arabidopsis* as a model system. *Biochem Soc Trans* 2005; 33: 380-383.  
691 doi:10.1042/BST0330380 PMID:15787611
- 692 40. Buchanan BB, Gruissem W, Jones RL. *Biochemistry & Molecular Biology of Plants*.  
693 Rockville, Maryland, USA: American Society of Plant Physiologists. 2000; p679-687.
- 694 41. Akram M. Citric acid cycle and role of its intermediates in metabolism. *Cell Biochem*  
695 *Biophys* 2014; 68: 475-478. doi:10.1007/s12013-013-9750-1 PMID:24068518
- 696 42. Frugis G, Chua NH. Ubiquitin-mediated proteolysis in plant hormone signal transduction.  
697 *Trends Cell Biol* 2002; 12: 308-311. PMID:12185846
- 698 43. Ogawa M, Hanada A, Yamauchi Y, Kuwahara A, Kamiya Y, Yamaguchi S. Gibberellin  
699 biosynthesis and response during *Arabidopsis* seed germination. *Plant Cell* 2003; 15:  
700 1591-1604. PMID:12837949
- 701 44. Carrera E, Holman T, Medhurst A, Dietrich D, Footitt S, Theodoulou FL, et al. Seed  
702 after-repening is a discrete development pathway associated with specific gene networks in  
703 *Arabidopsis*. *Plant J* 2008; 53: 214-224. doi: 10.1111/j.1365-313X.2007.03331.x
- 704 45. Cadman CS, Toorop PE, Hilhorst HW, Finch-Savage WE. Gene expression profiles of  
705 *Arabidopsis Cvi* seeds during dormancy cycling indicate a common underlying dormancy  
706 control mechanism. *Plant J* 2006; 46: 805-822. doi:10.1111/j.1365-313X.2006.02738.x  
707 PMID:16709196
- 708 46. Gao F, Jordan MC, Ayele BT. Transcriptional programs regulating seed dormancy and its  
709 release by after-ripening in common wheat (*Triticum aestivum* L.). *Plant Biotechnol J* 2012;  
710 10: 465-476. doi:10.1111/j.1467-7652.2012.00682.x PMID:22292455
- 711 47. Meimoun P, Mordret E, Langlade NB, Balzergue S, Arribat S, Bailly C, et al. Is gene  
712 transcription involved in seed dry after-ripening? *PLoS One* 2014; 9: e86442.  
713 doi:10.1371/journal.pone.0086442 PMID:24466101
- 714 48. Chitnis VR, Gao F, Yao Z, Jordan MC, Park S, Ayele BT. After-ripening induced  
715 transcriptional changes of hormonal genes in wheat seeds: the cases of brassinosteroids,  
716 ethylene, cytokinin and salicylic acid. *PLoS One* 2014; 9: e87543.  
717 doi:10.1371/journal.pone.0087543 PMID:24498132
- 718 49. Graham IA. Seed storage oil mobilization. *Annu Rev Plant Biol* 2008; 59: 115-142.  
719 doi:10.1146/annurev.arplant.59.032607.092938 PMID:18444898
- 720 50. Finkelstein R, Reeves W, Ariizumi T, Steber C. Molecular aspects of seed dormancy. *Annu*  
721 *Rev Plant Biol* 2008; 59: 387-415. doi:10.1146/annurev.arplant.59.032607.092740  
722 PMID:18257711
- 723 51. Kermode AR. Role of Abscisic Acid in Seed Dormancy. *Journal of Plant Growth Regulation*  
724 2005; 24: 319-344. doi:10.1007/s00344-005-0110-2
- 725 52. Wang Y, and Deng, D. Molecular basis and evolutionary pattern of GA-GID1-DELLA  
726 regulatory module. *Mol Genet Genomics* 2014; 289: 1-9. doi:10.1007/s00438-013-0797-x

- 727 53. Chen F, Dahal P, Bradford KJ. Two Tomato Expansin Genes Show Divergent Expression  
728 and Localization in Embryos during Seed Development and Germination. *Plant Physiology*  
729 2001; 127: 928-936. doi:10.1104/pp.010259
- 730 54. Chen F, Nonogaki H, Bradford KJ. A gibberellin-regulated xyloglucan endotransglycosylase  
731 gene is expressed in the endosperm cap during tomato seed germination. *J Exp Bot* 2002; 53:  
732 215-223.
- 733 55. Marowa P, Ding A, Kong Y. Expansins: roles in plant growth and potential applications in  
734 crop improvement. *Plant Cell Rep* 2016; 35: 949-965. doi:10.1007/s00299-016-1948-4  
735 PMID:26888755
- 736 56. Yan A, Wu M, Yan L, Hu R, Ali I, Gan Y. AtEXP2 is involved in seed germination and  
737 abiotic stress response in Arabidopsis. *PLoS One* 2014; 9: e85208.  
738 doi:10.1371/journal.pone.0085208 PMID:24404203
- 739 57. Goda H, Shimada Y, Asami T, Fujioka S, Yoshida S. Microarray analysis of  
740 brassinosteroid-regulated genes in Arabidopsis. *Plant Physiol* 2002; 130: 1319-1334.  
741 doi:10.1104/pp.011254 PMID:12427998
- 742 58. Leubner-Metzger G. Brassinosteroids and gibberellins promote tobacco seed germination by  
743 distinct pathways. *Planta* 2001; 213: 758-763. doi:10.1007/s004250100542  
744 PMID:11678280
- 745 59. Kim TW, Wang ZY. Brassinosteroid signal transduction from receptor kinases to  
746 transcription factors. *Annu Rev Plant Biol* 2010; 61: 681-704.  
747 doi:10.1146/annurev.arplant.043008.092057 PMID:20192752
- 748 60. Nie S, Huang S, Wang S, Cheng D, Liu J, Lv S, et al. Enhancing Brassinosteroid Signaling  
749 via Overexpression of Tomato (*Solanum lycopersicum*) SIBRI1 Improves Major Agronomic  
750 Traits. *Front Plant Sci* 2017; 8: 1386. doi:10.3389/fpls.2017.01386 PMID:28848587
- 751 61. Steber CM, McCourt P. A Role for Brassinosteroids in Germination in Arabidopsis. *Plant*  
752 *Physiology* 2001; 125: 763-769.
- 753 62. Sun Y, Fan XY, Cao DM, Tang W, He K, Zhu JY, et al. Integration of brassinosteroid signal  
754 transduction with the transcription network for plant growth regulation in Arabidopsis. *Dev*  
755 *Cell* 2010; 19: 765-777. doi:10.1016/j.devcel.2010.10.010 PMID:21074725
- 756 63. Liu K, Li Y, Chen X, Li L, Liu K, Zhao H, et al. ERF72 interacts with ARF6 and BZR1 to  
757 regulate hypocotyl elongation in Arabidopsis. *J Exp Bot* 2018; 69: 3933-3947.  
758 doi:10.1093/jxb/ery220 PMID:29897568
- 759 64. Oh E, Zhu JY, Bai MY, Arenhart RA, Sun Y, Wang ZY. Cell elongation is regulated through  
760 a central circuit of interacting transcription factors in the Arabidopsis hypocotyl. *Elife* 2014;  
761 3. doi:10.7554/eLife.03031 PMID:24867218
- 762 65. Goda H, Sawa S, Asami T, Fujioka S, Shimada Y, Yoshida S. Comprehensive comparison of  
763 auxin-regulated and brassinosteroid-regulated genes in Arabidopsis. *Plant Physiol* 2004; 134:  
764 1555-1573. doi:10.1104/pp.103.034736 PMID:15047898
- 765 66. Liu Y, Muller K, El-Kassaby YA, Kermode AR. Changes in hormone flux and signaling in  
766 white spruce (*Picea glauca*) seeds during the transition from dormancy to germination in  
767 response to temperature cues. *BMC Plant Biol* 2015; 15: 292.  
768 doi:10.1186/s12870-015-0638-7 PMID:26680643

- 769 67. Nemhauser JL, Mockler TC, Chory J. Interdependency of brassinosteroid and auxin signaling  
770 in Arabidopsis. PLoS Biol 2004; 2: E258. doi:10.1371/journal.pbio.0020258  
771 PMID:15328536
- 772 68. Chapman EJ, Estelle M. Mechanism of auxin-regulated gene expression in plants. Annu Rev  
773 Genet 2009; 43: 265-285. doi:10.1146/annurev-genet-102108-134148 PMID:19686081
- 774 69. An ND, Wang LJ, Ding HC, Xu ZH. Auxin distribution and transport during embryogenesis  
775 and seed germination of Arabidopsis. Cell Research 2001; 11: 273-278.
- 776 70. Rigas S, Ditengou FA, Ljung K, Daras G, Tietz O, Palme K, et al. Root gravitropism and root  
777 hair development constitute coupled developmental responses regulated by auxin homeostasis  
778 in the Arabidopsis root apex. New Phytol 2013; 197: 1130-1141. doi:10.1111/nph.12092  
779 PMID:23252740
- 780 71. Walcher CL, Nemhauser JL. Bipartite promoter element required for auxin response.  
781 Plant Physiol 2012; 158: 273-282. doi:10.1104/pp.111.187559 PMID:22100645

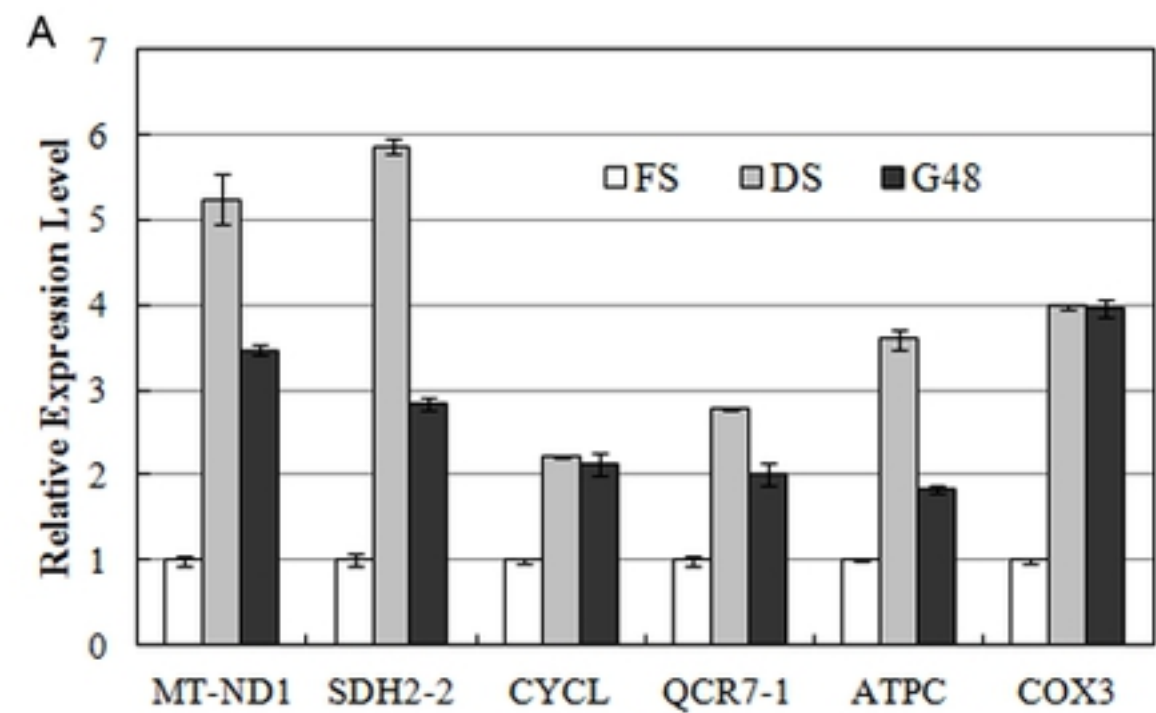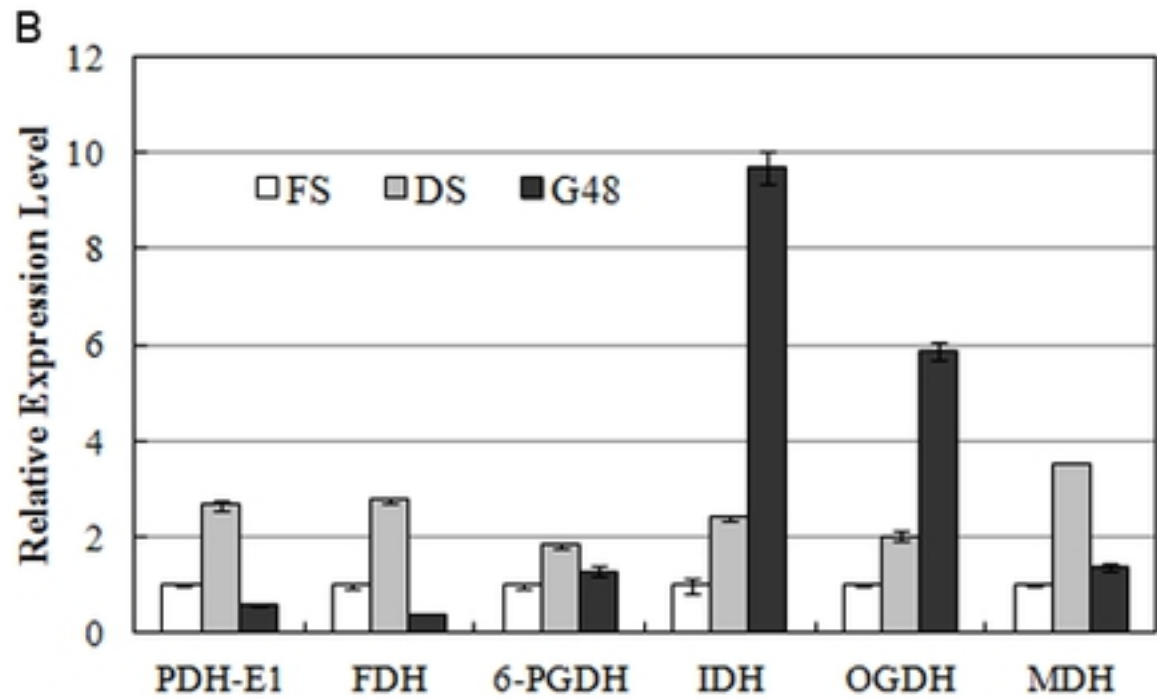

Figure 5

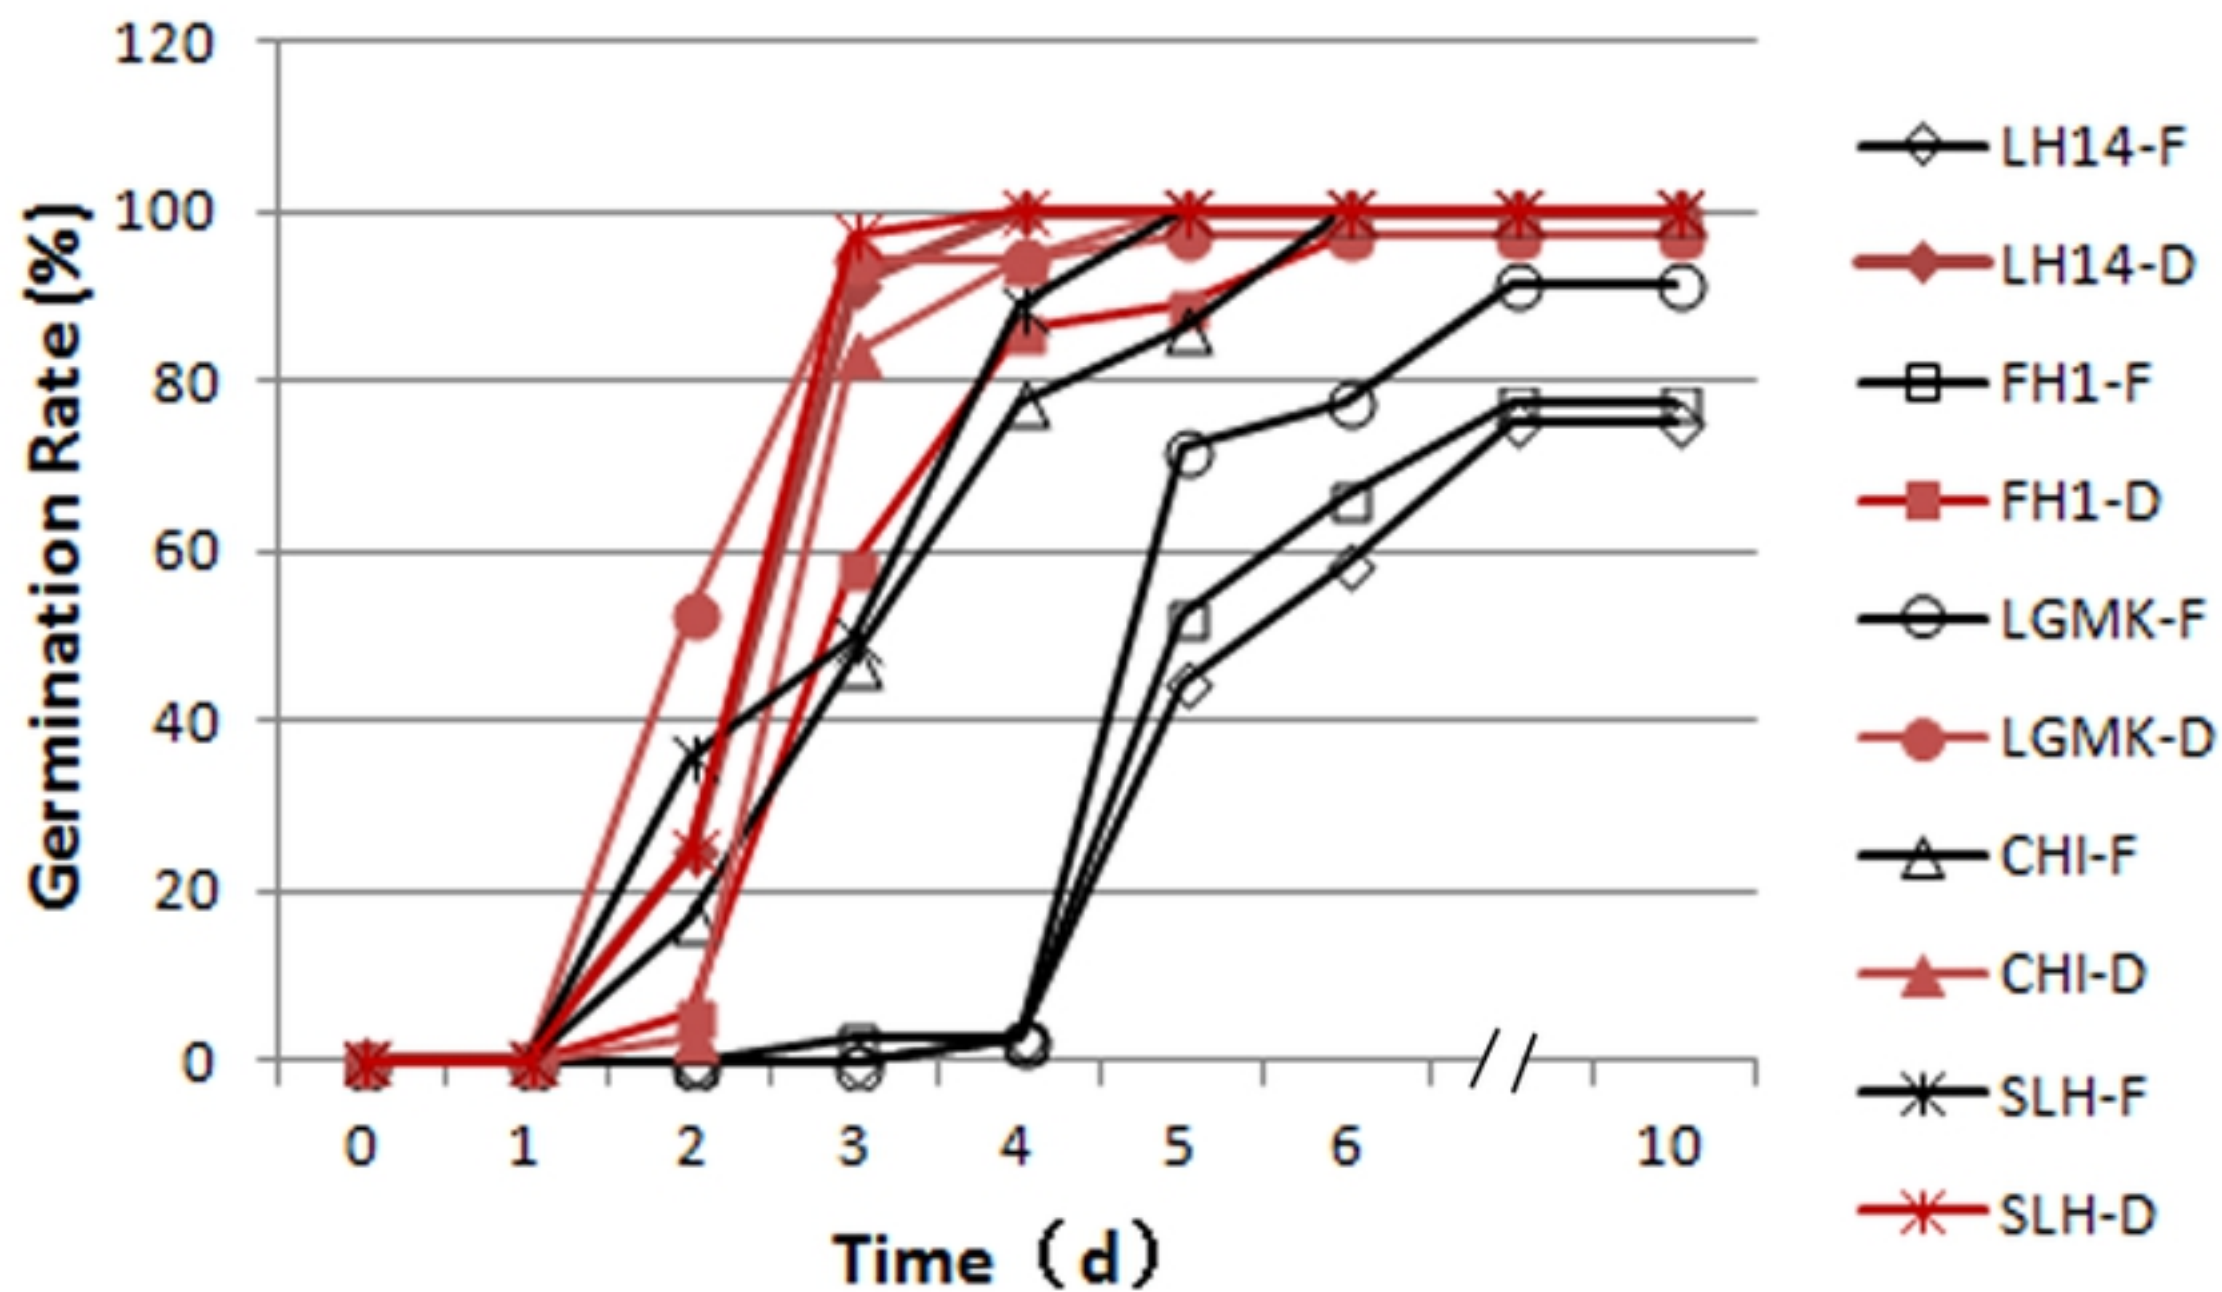

Figure 1



# DSvsFS

# GSvsDS

bioRxiv preprint doi: <https://doi.org/10.1101/690248>; this version posted July 2, 2019. The copyright holder for this preprint (which was not certified by peer review) is the author/funder, who has granted bioRxiv a license to display the preprint in perpetuity. It is made available under aCC-BY 4.0 International license.

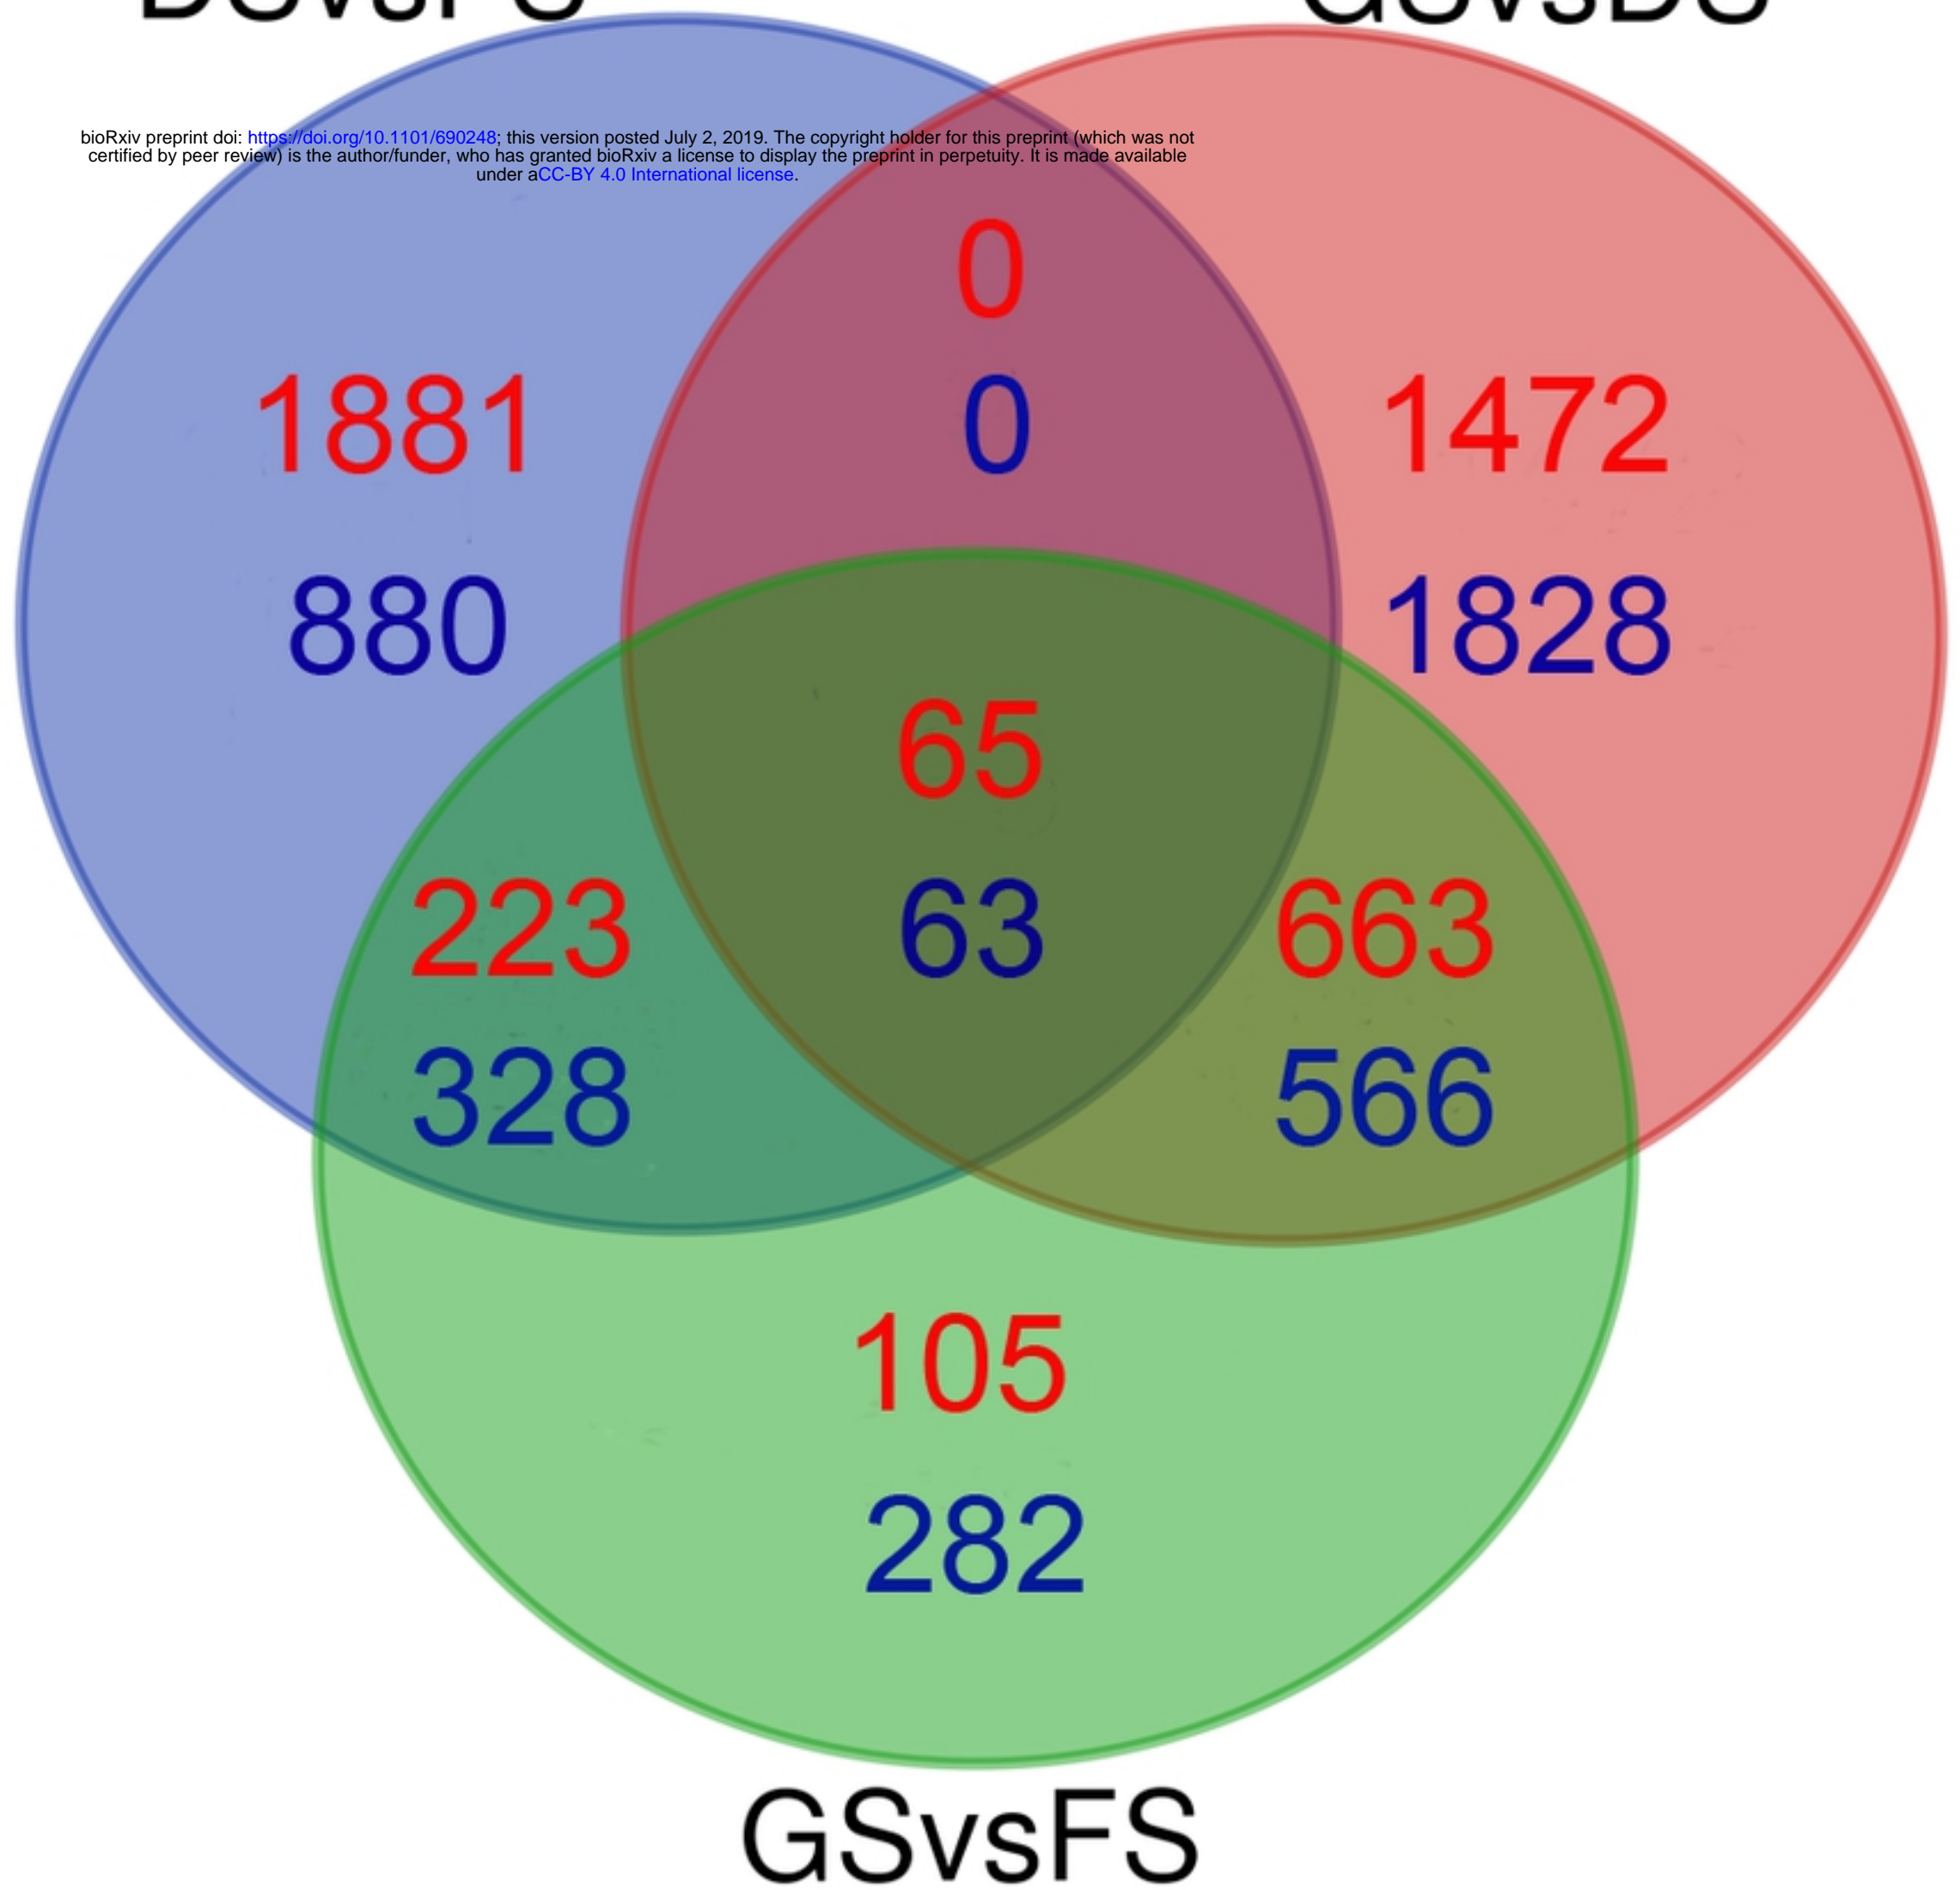

Figure2

A

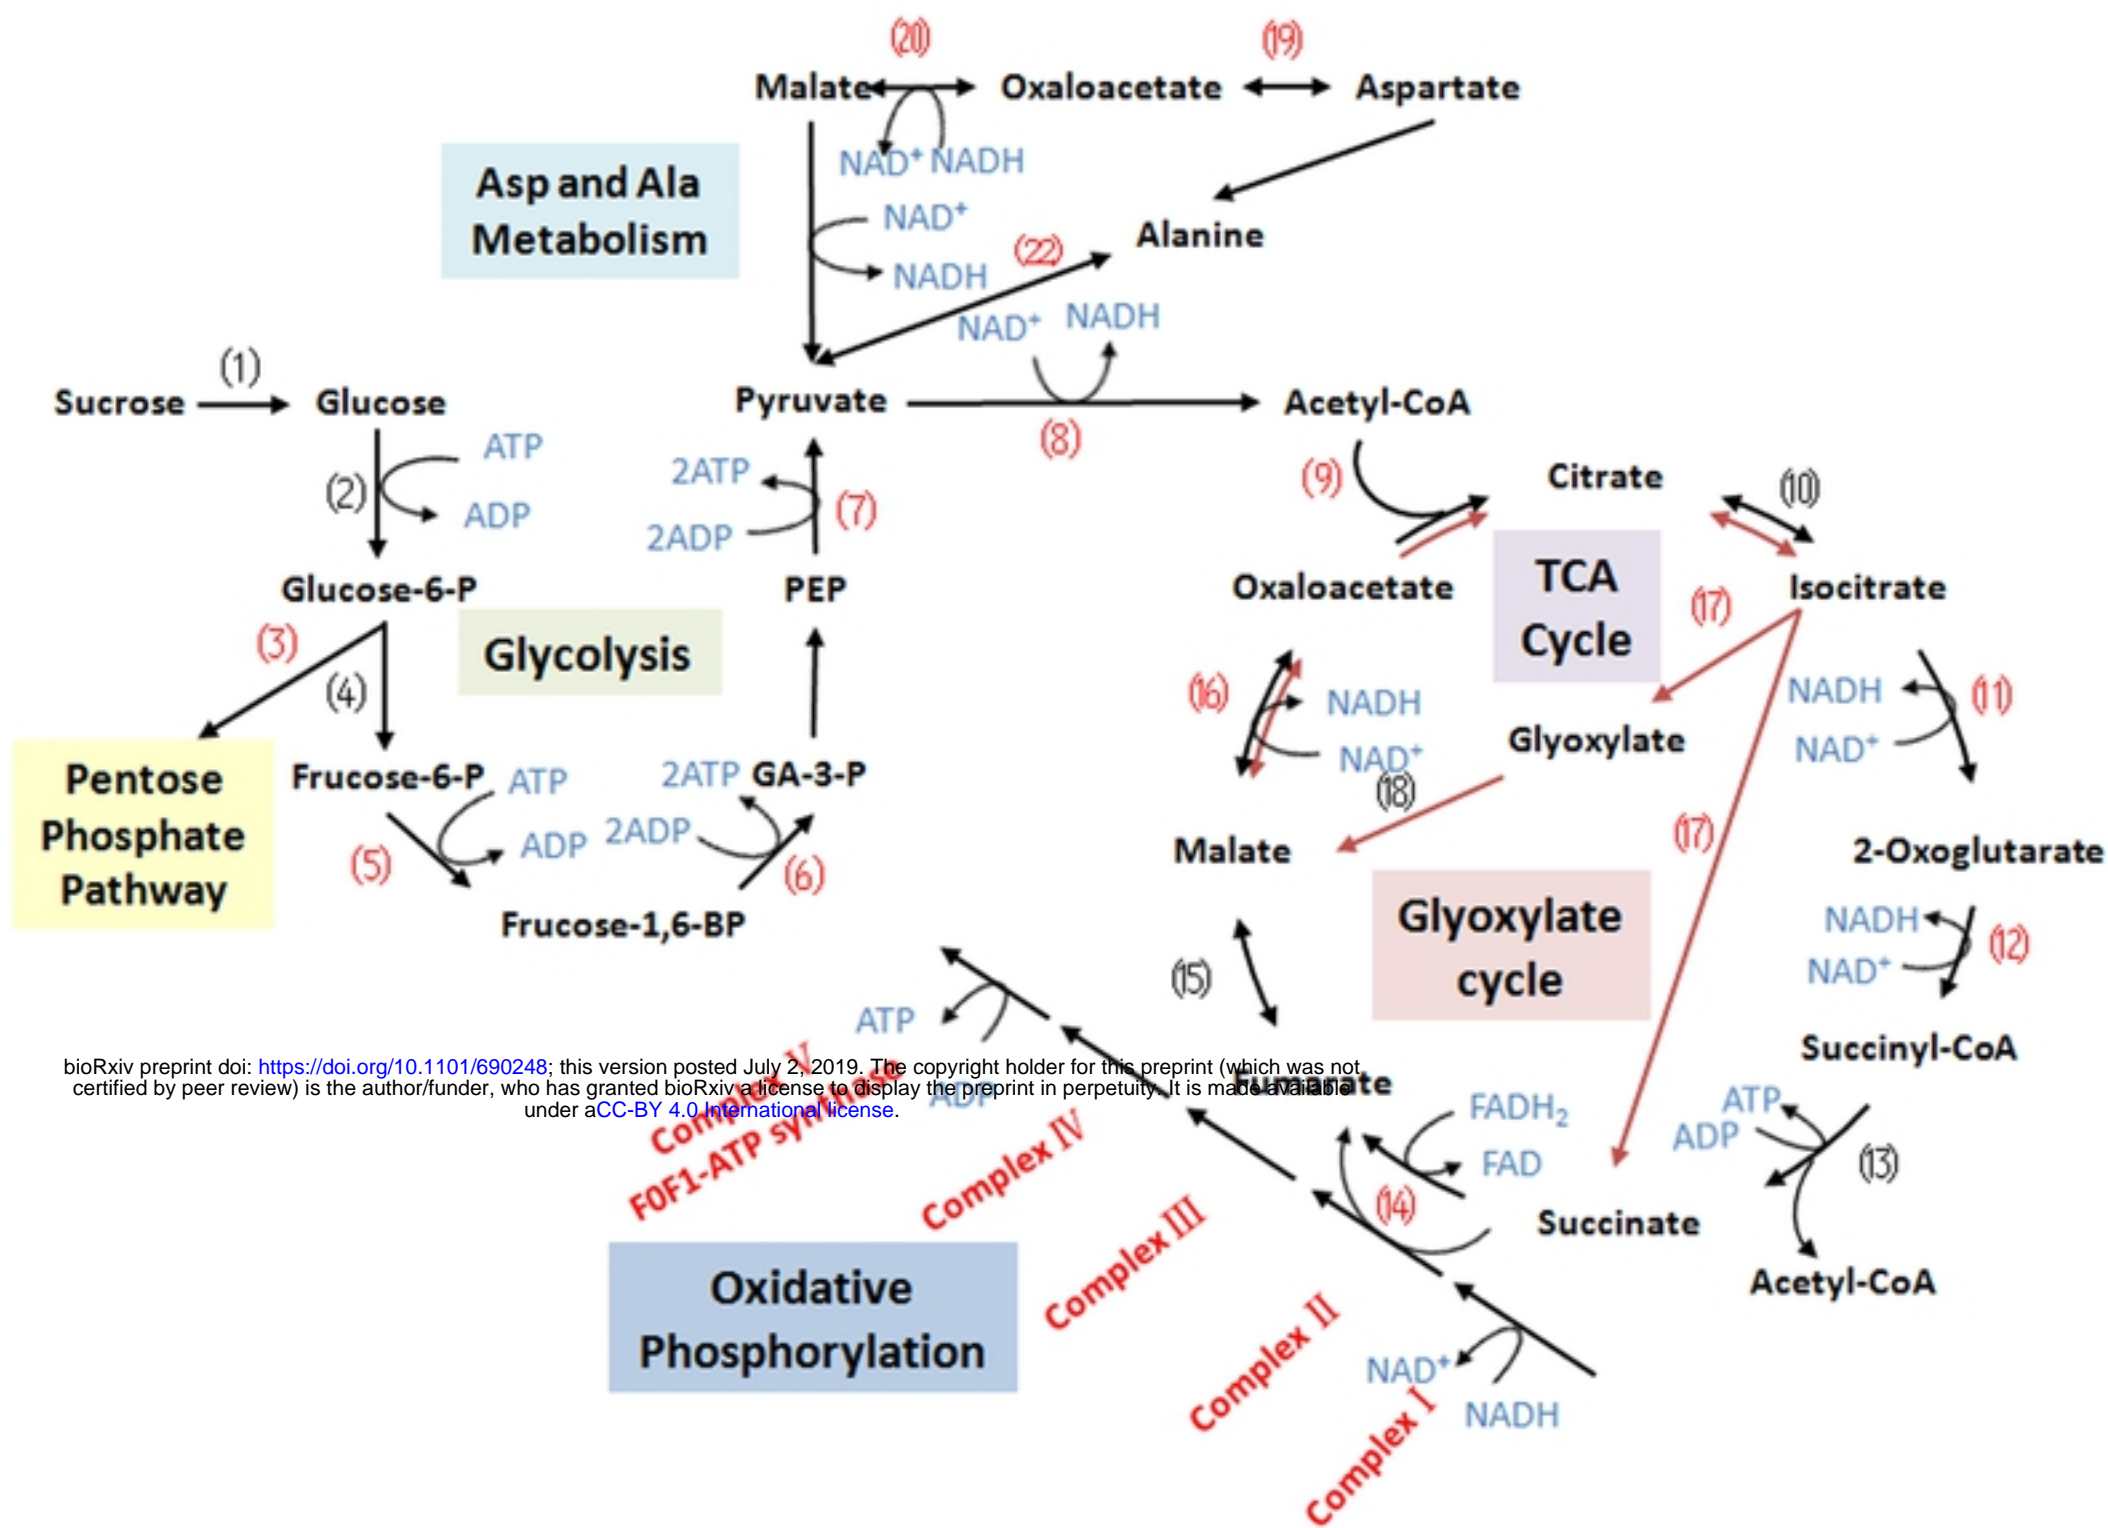

B

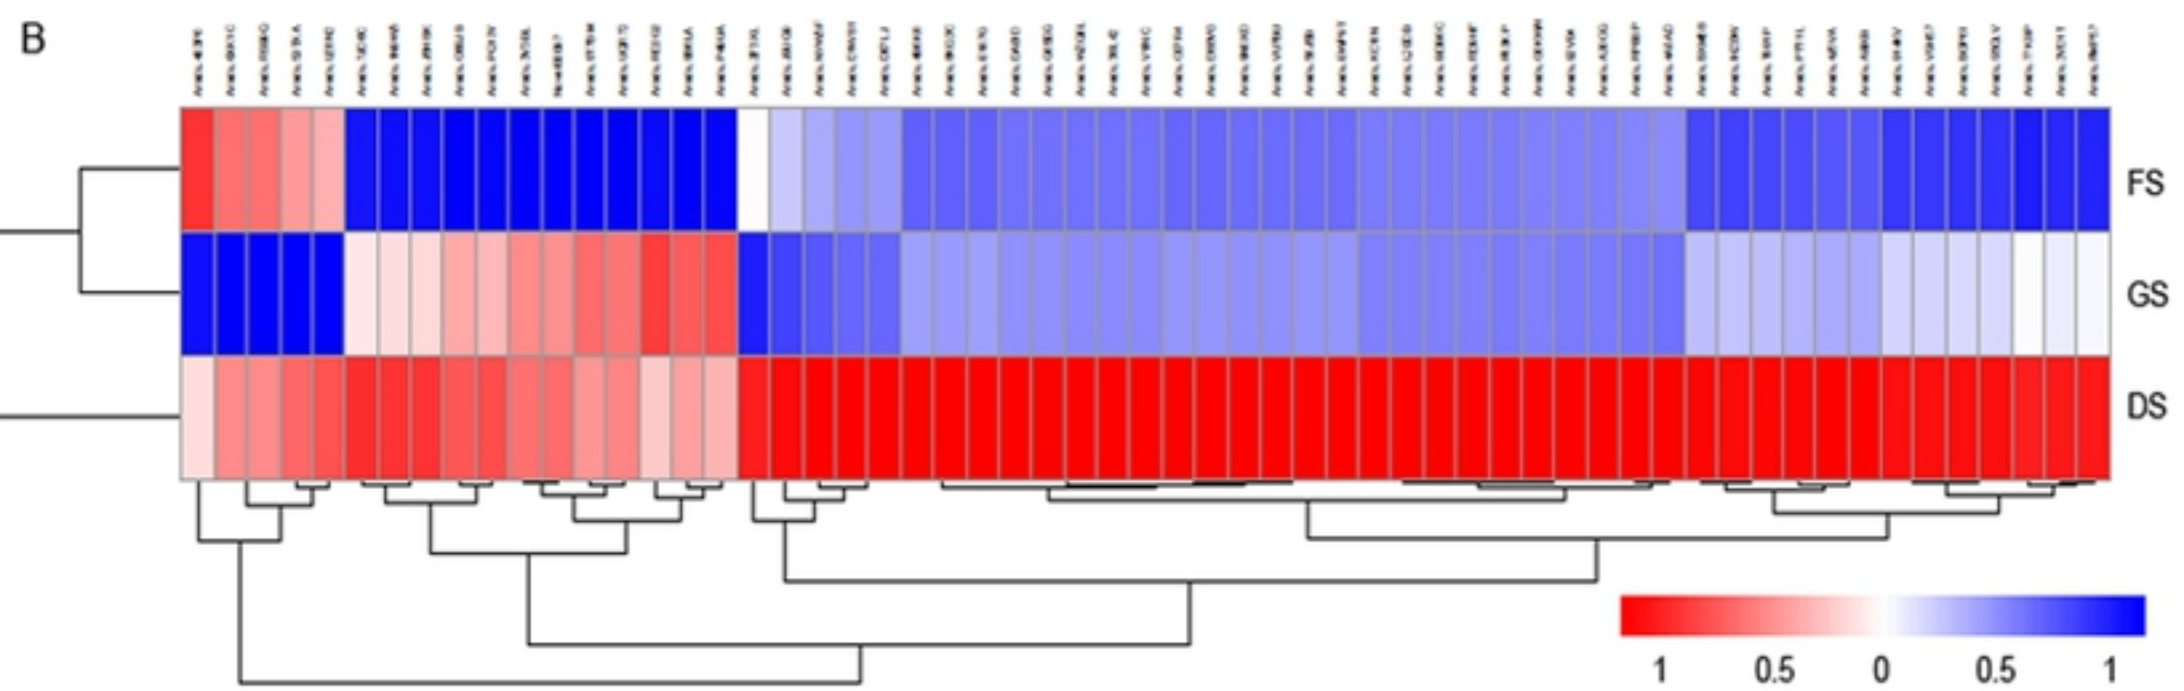

C

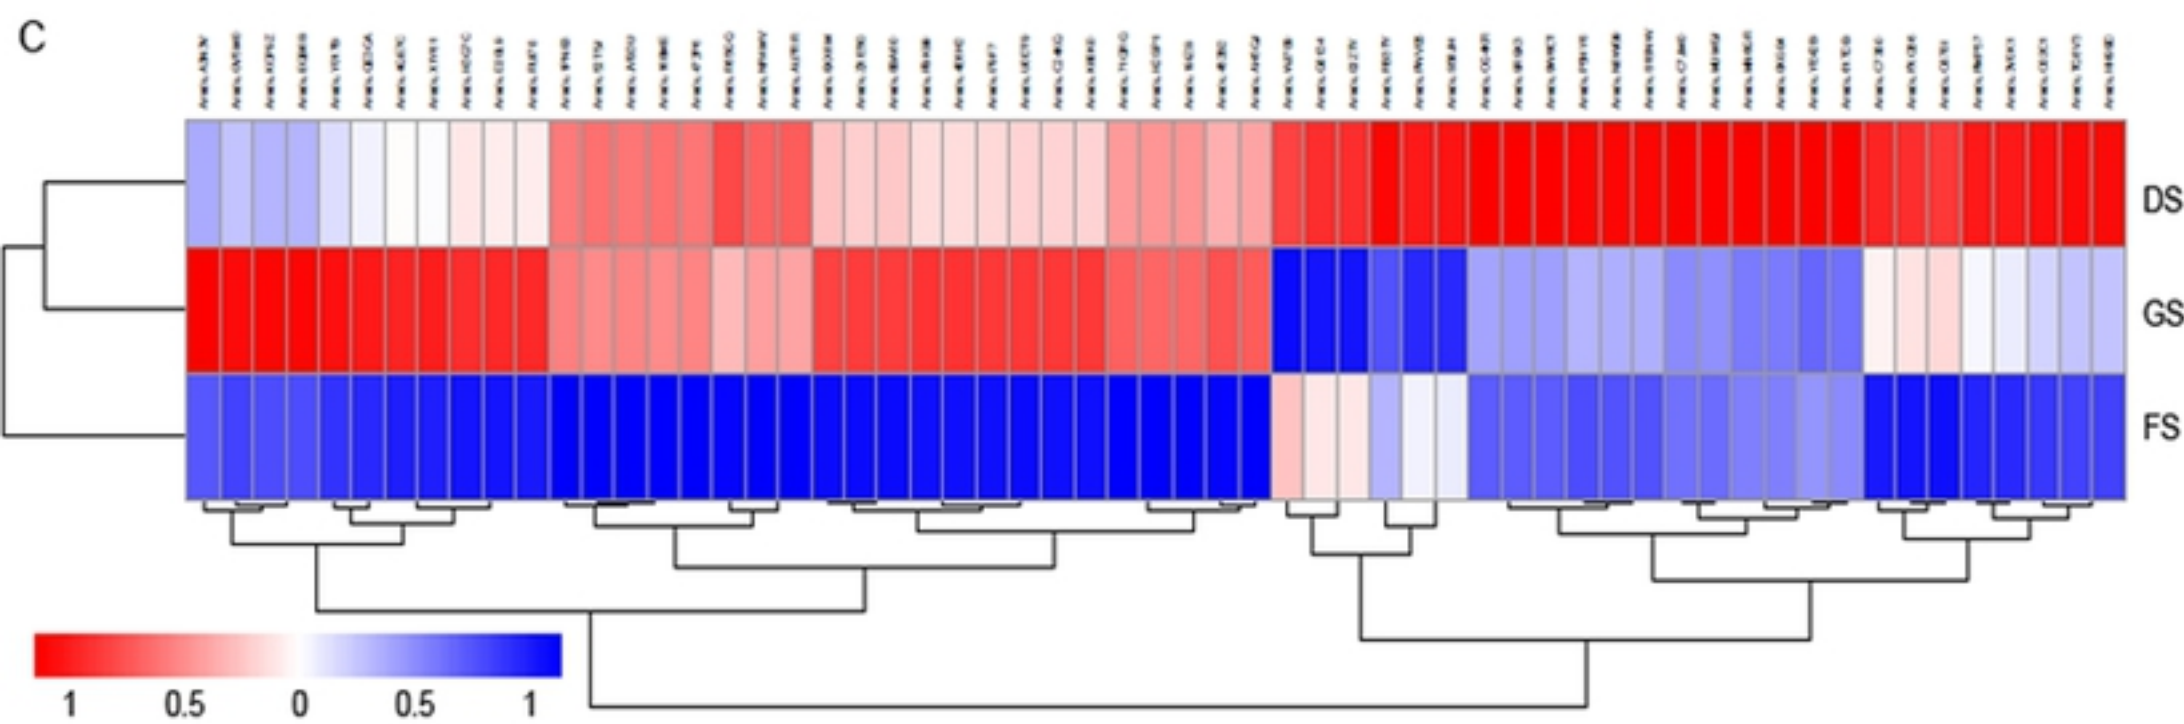

Figure4

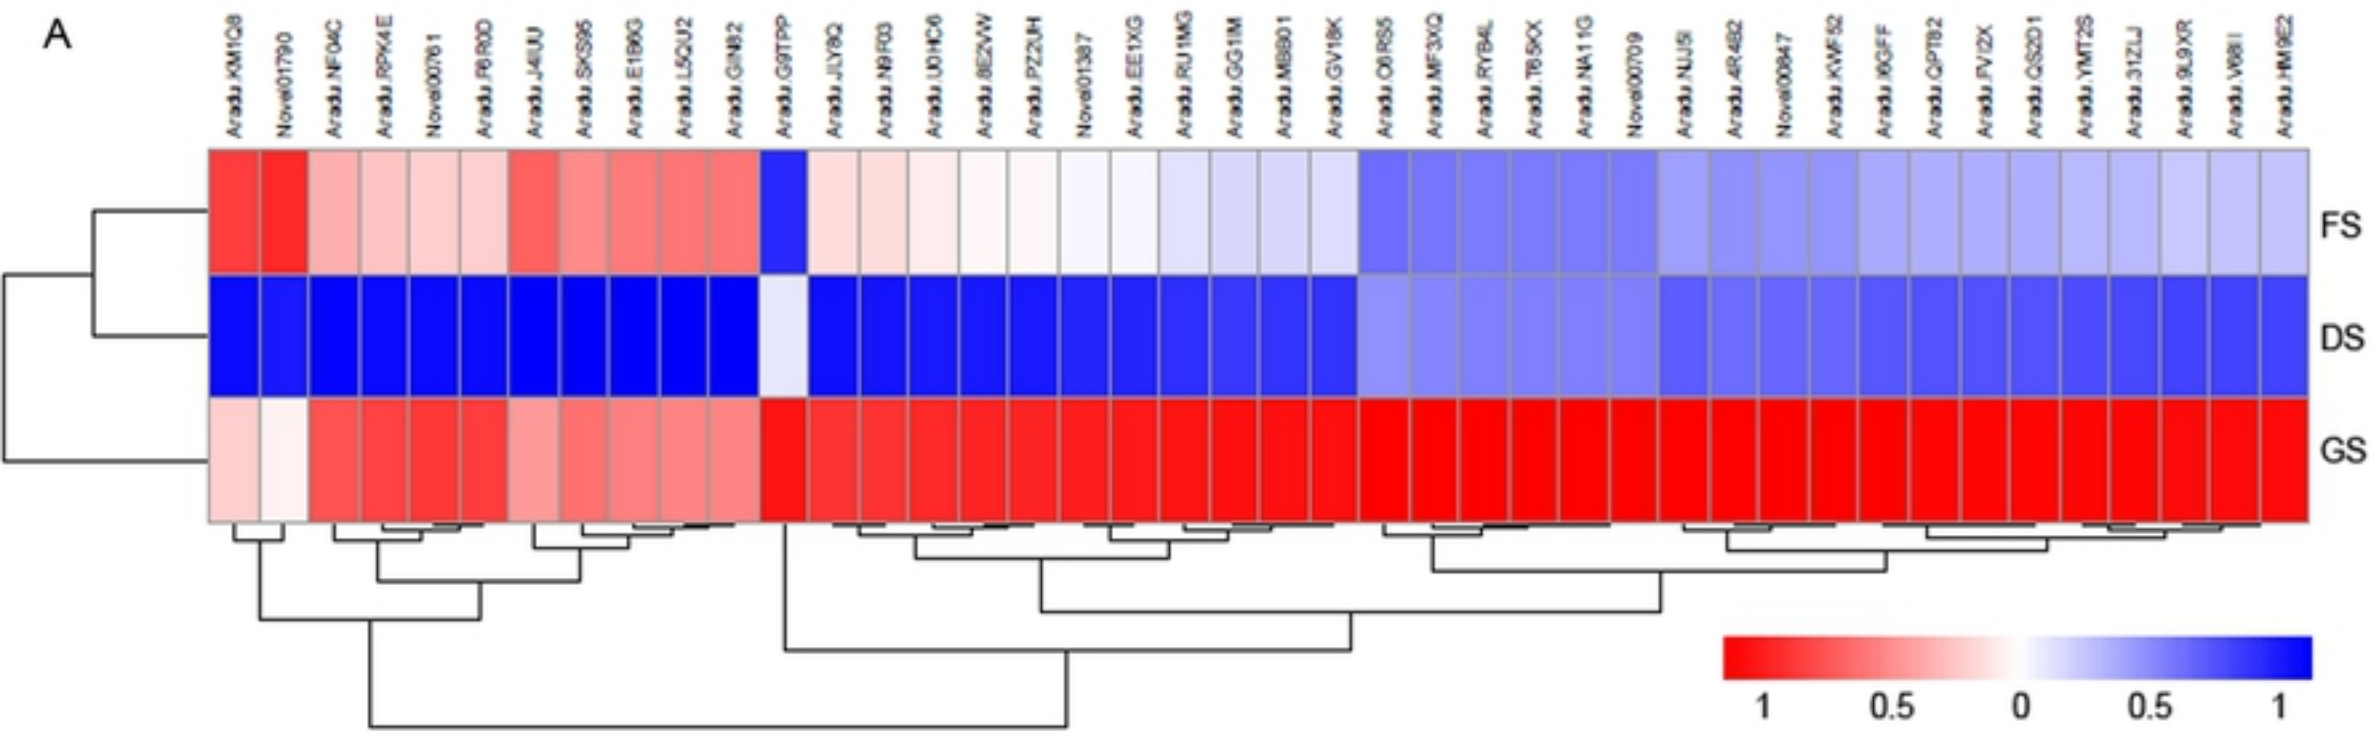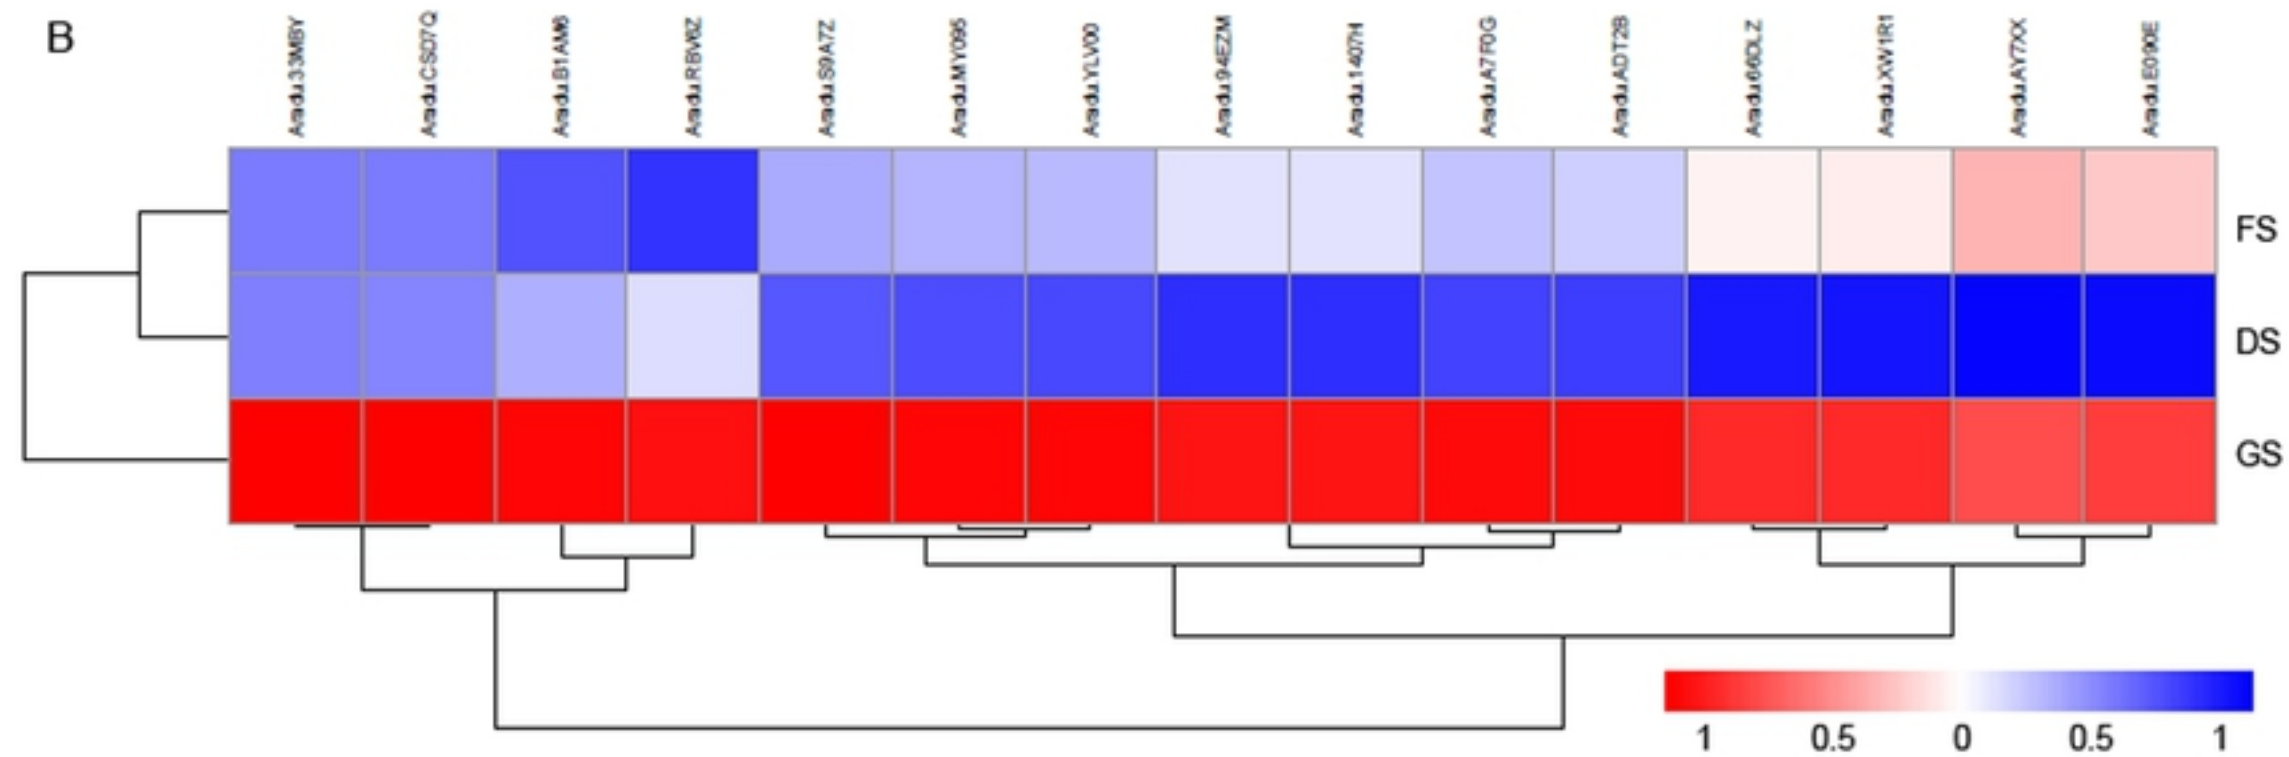

Figure6



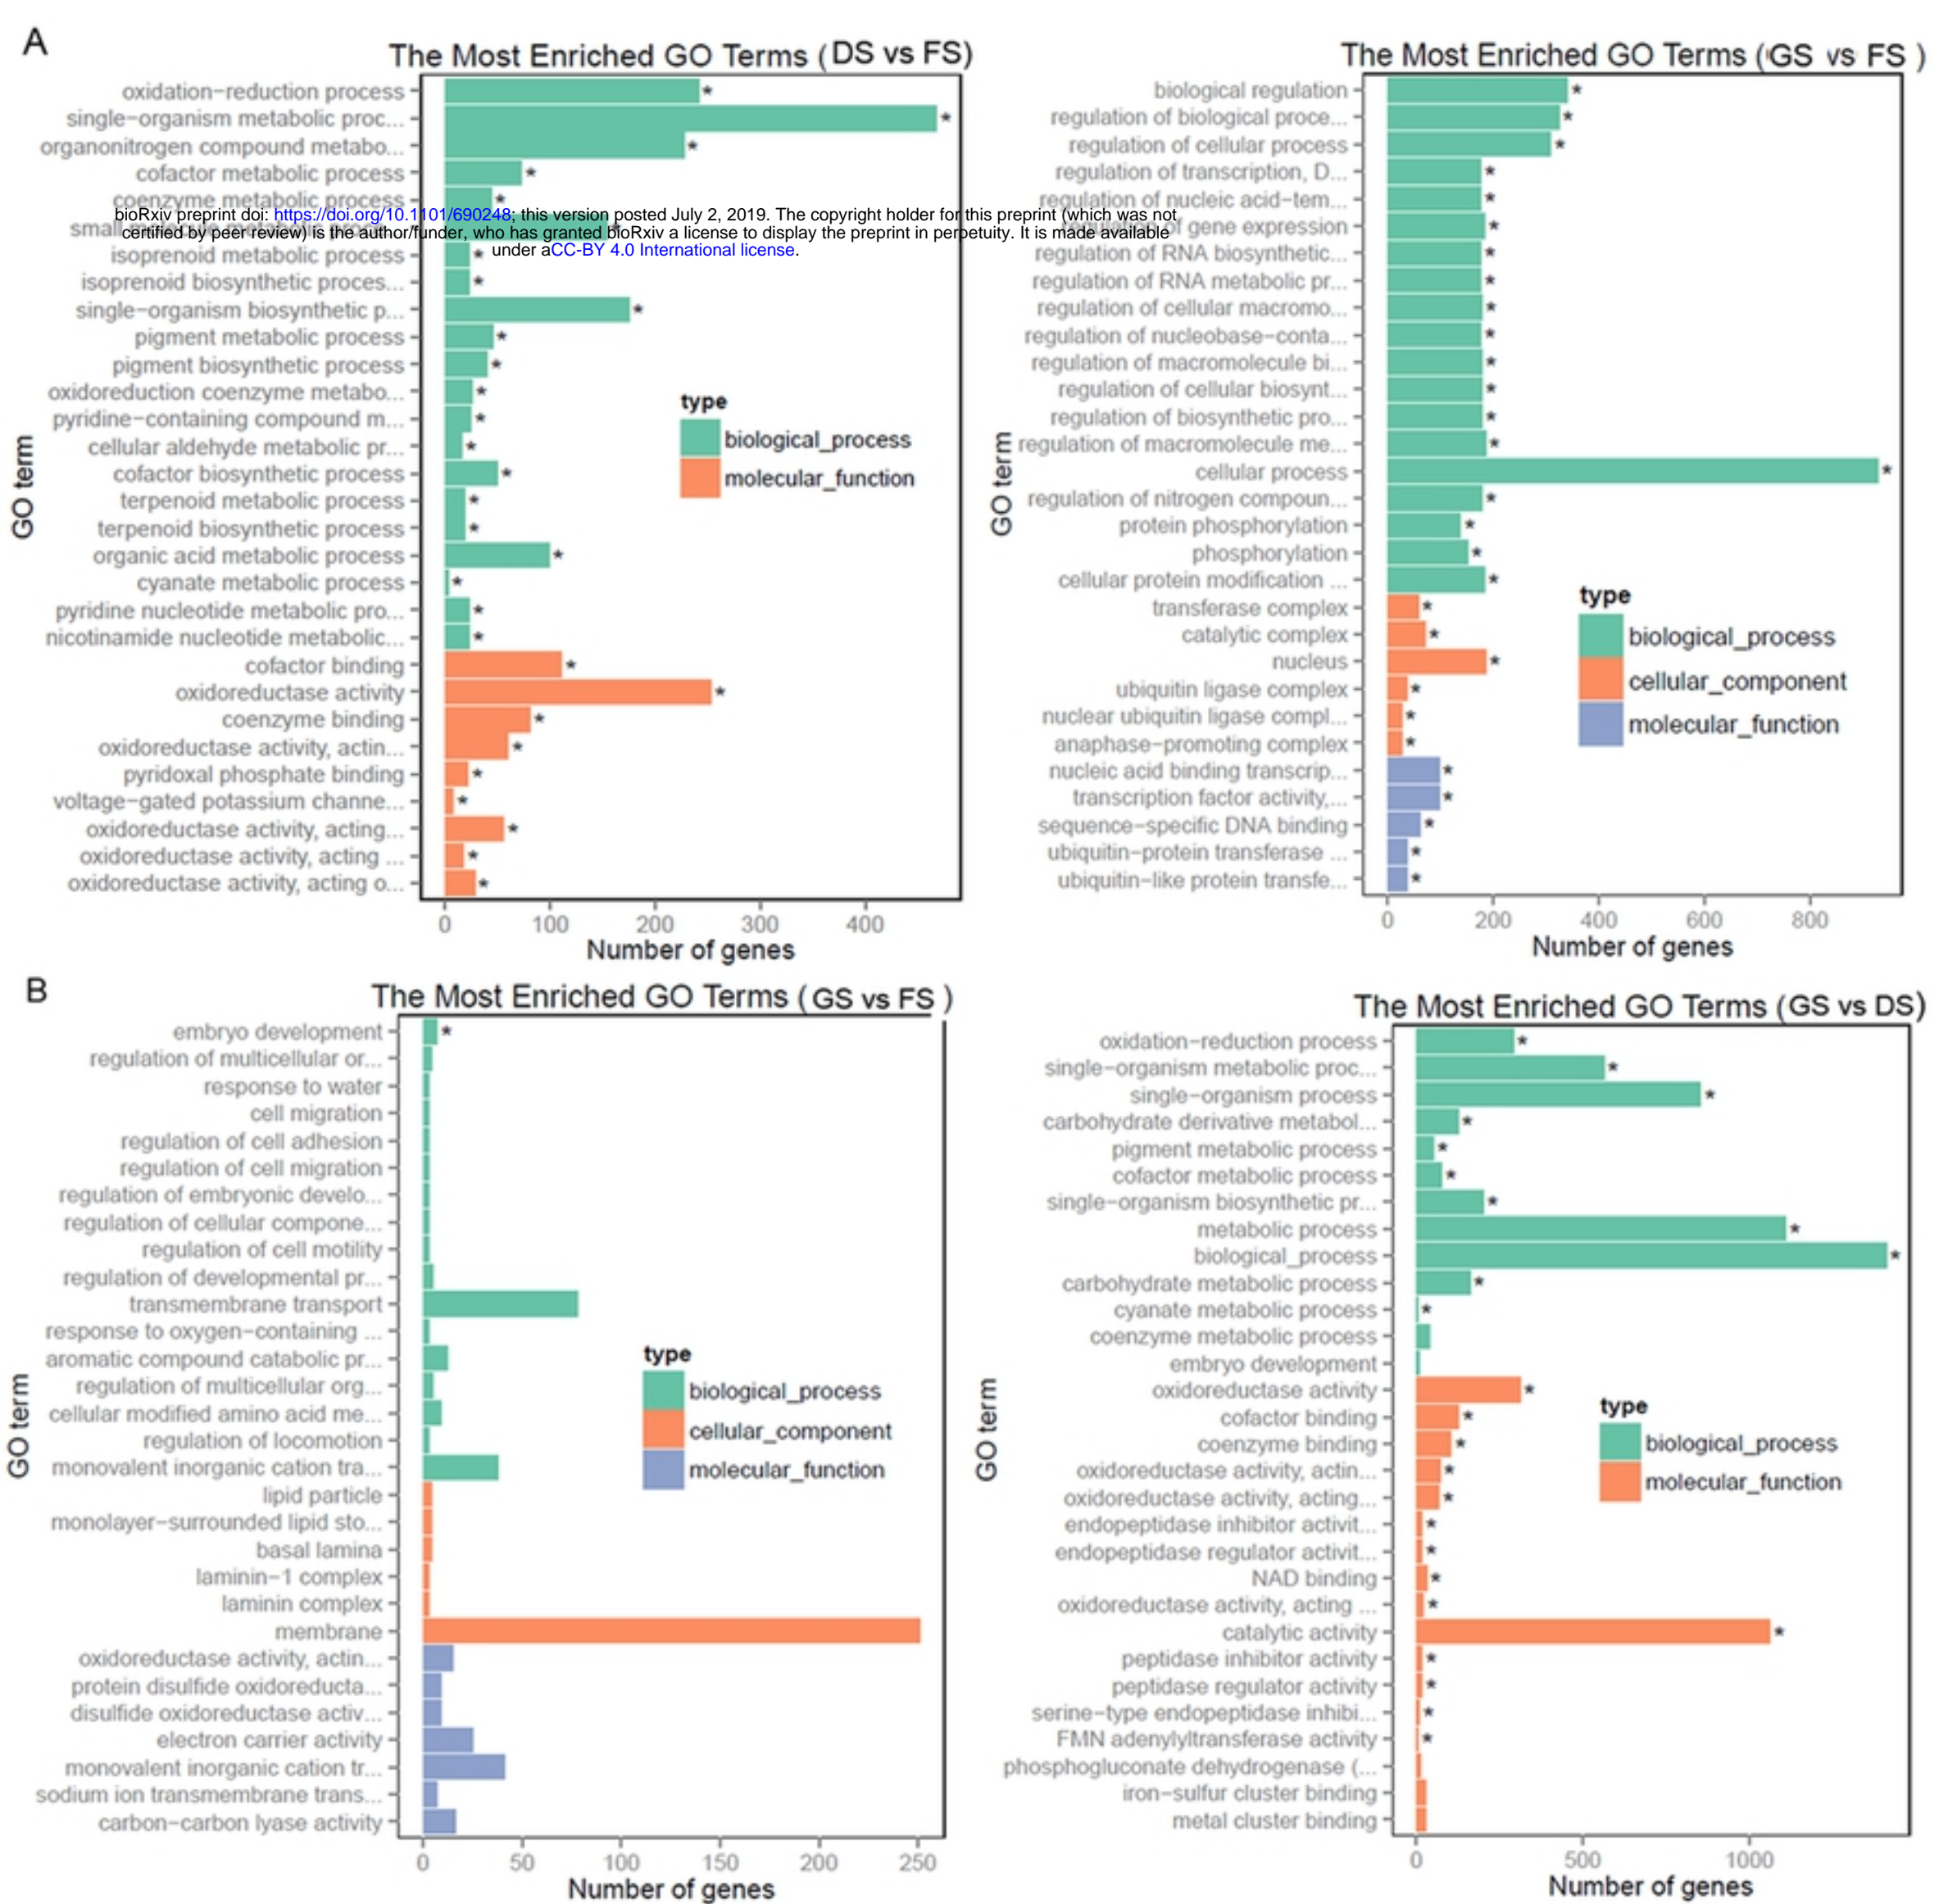

Figure3

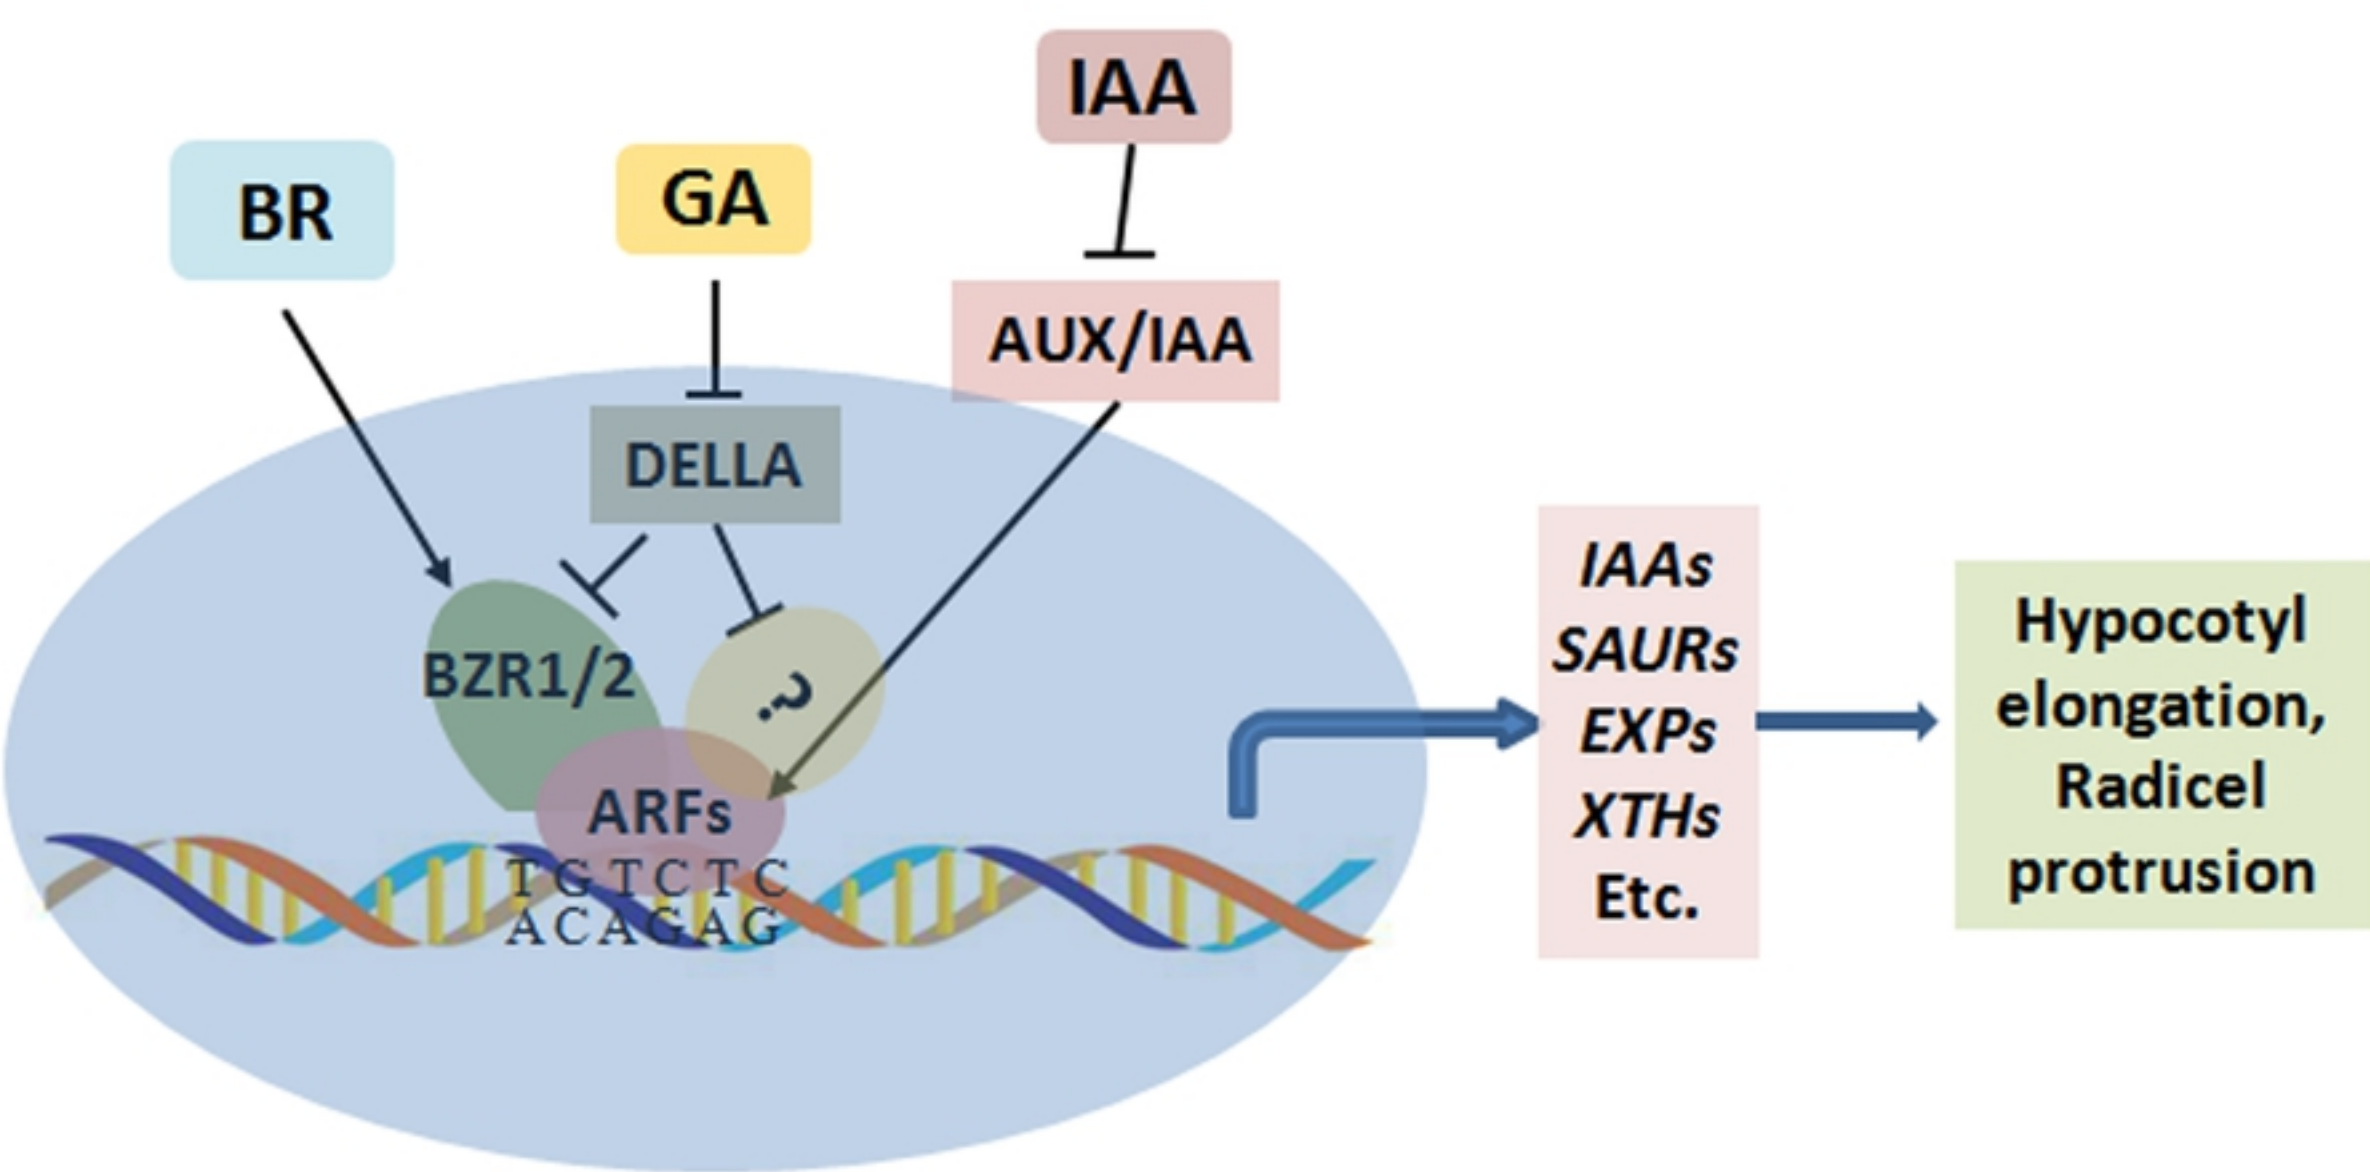

Figure9

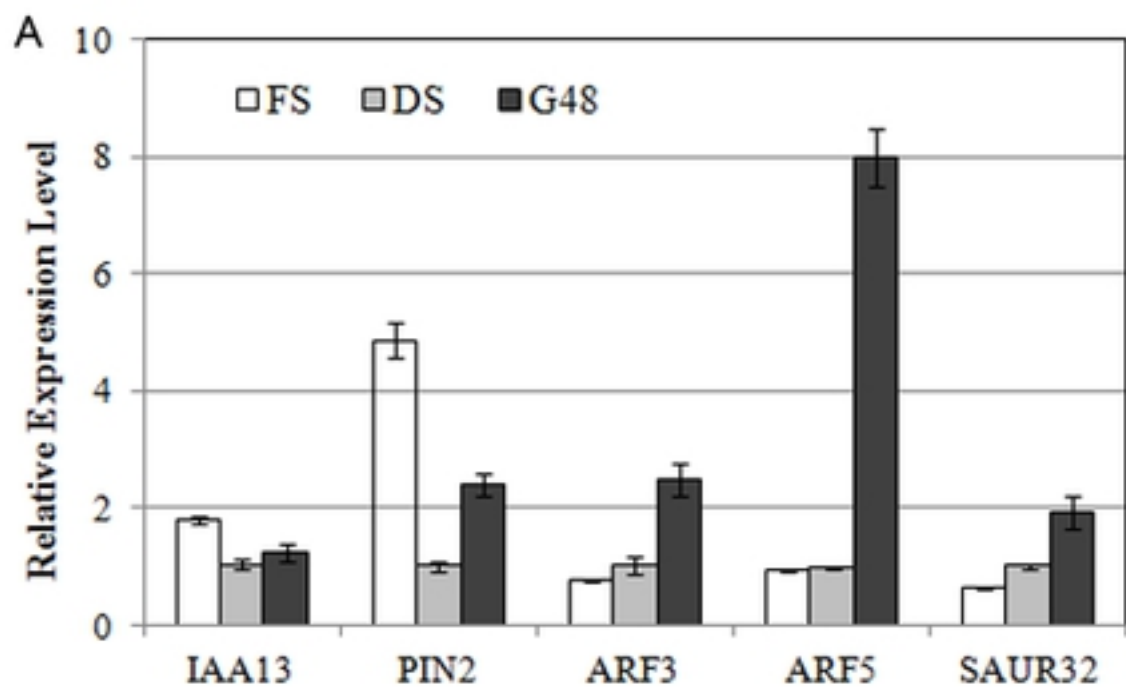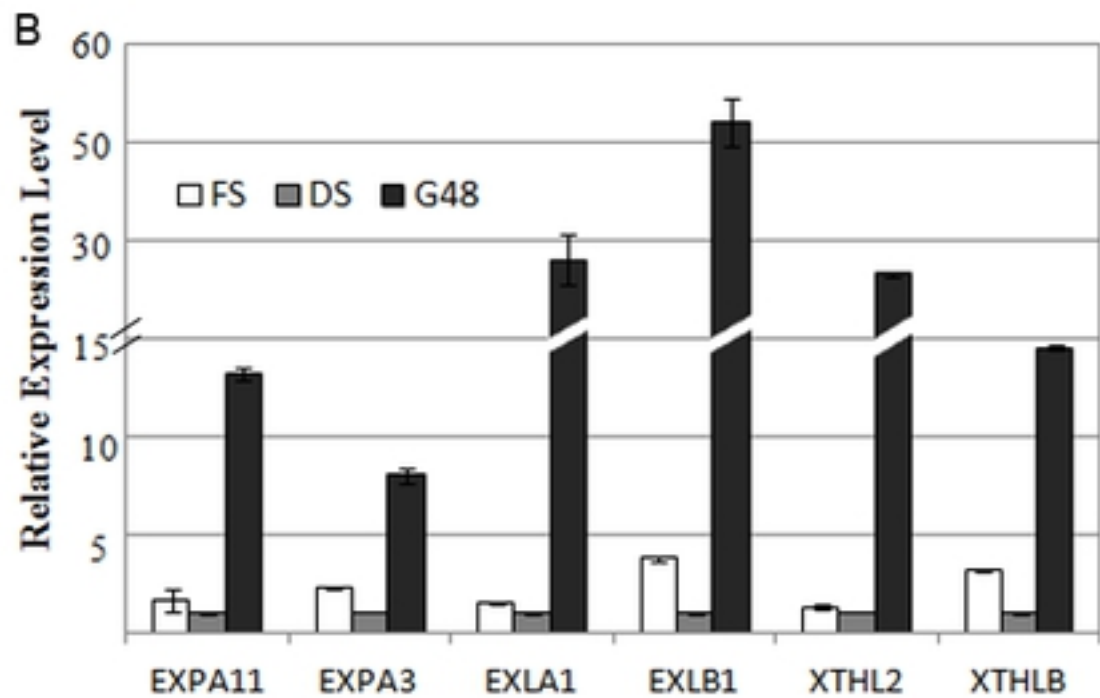

Figure7



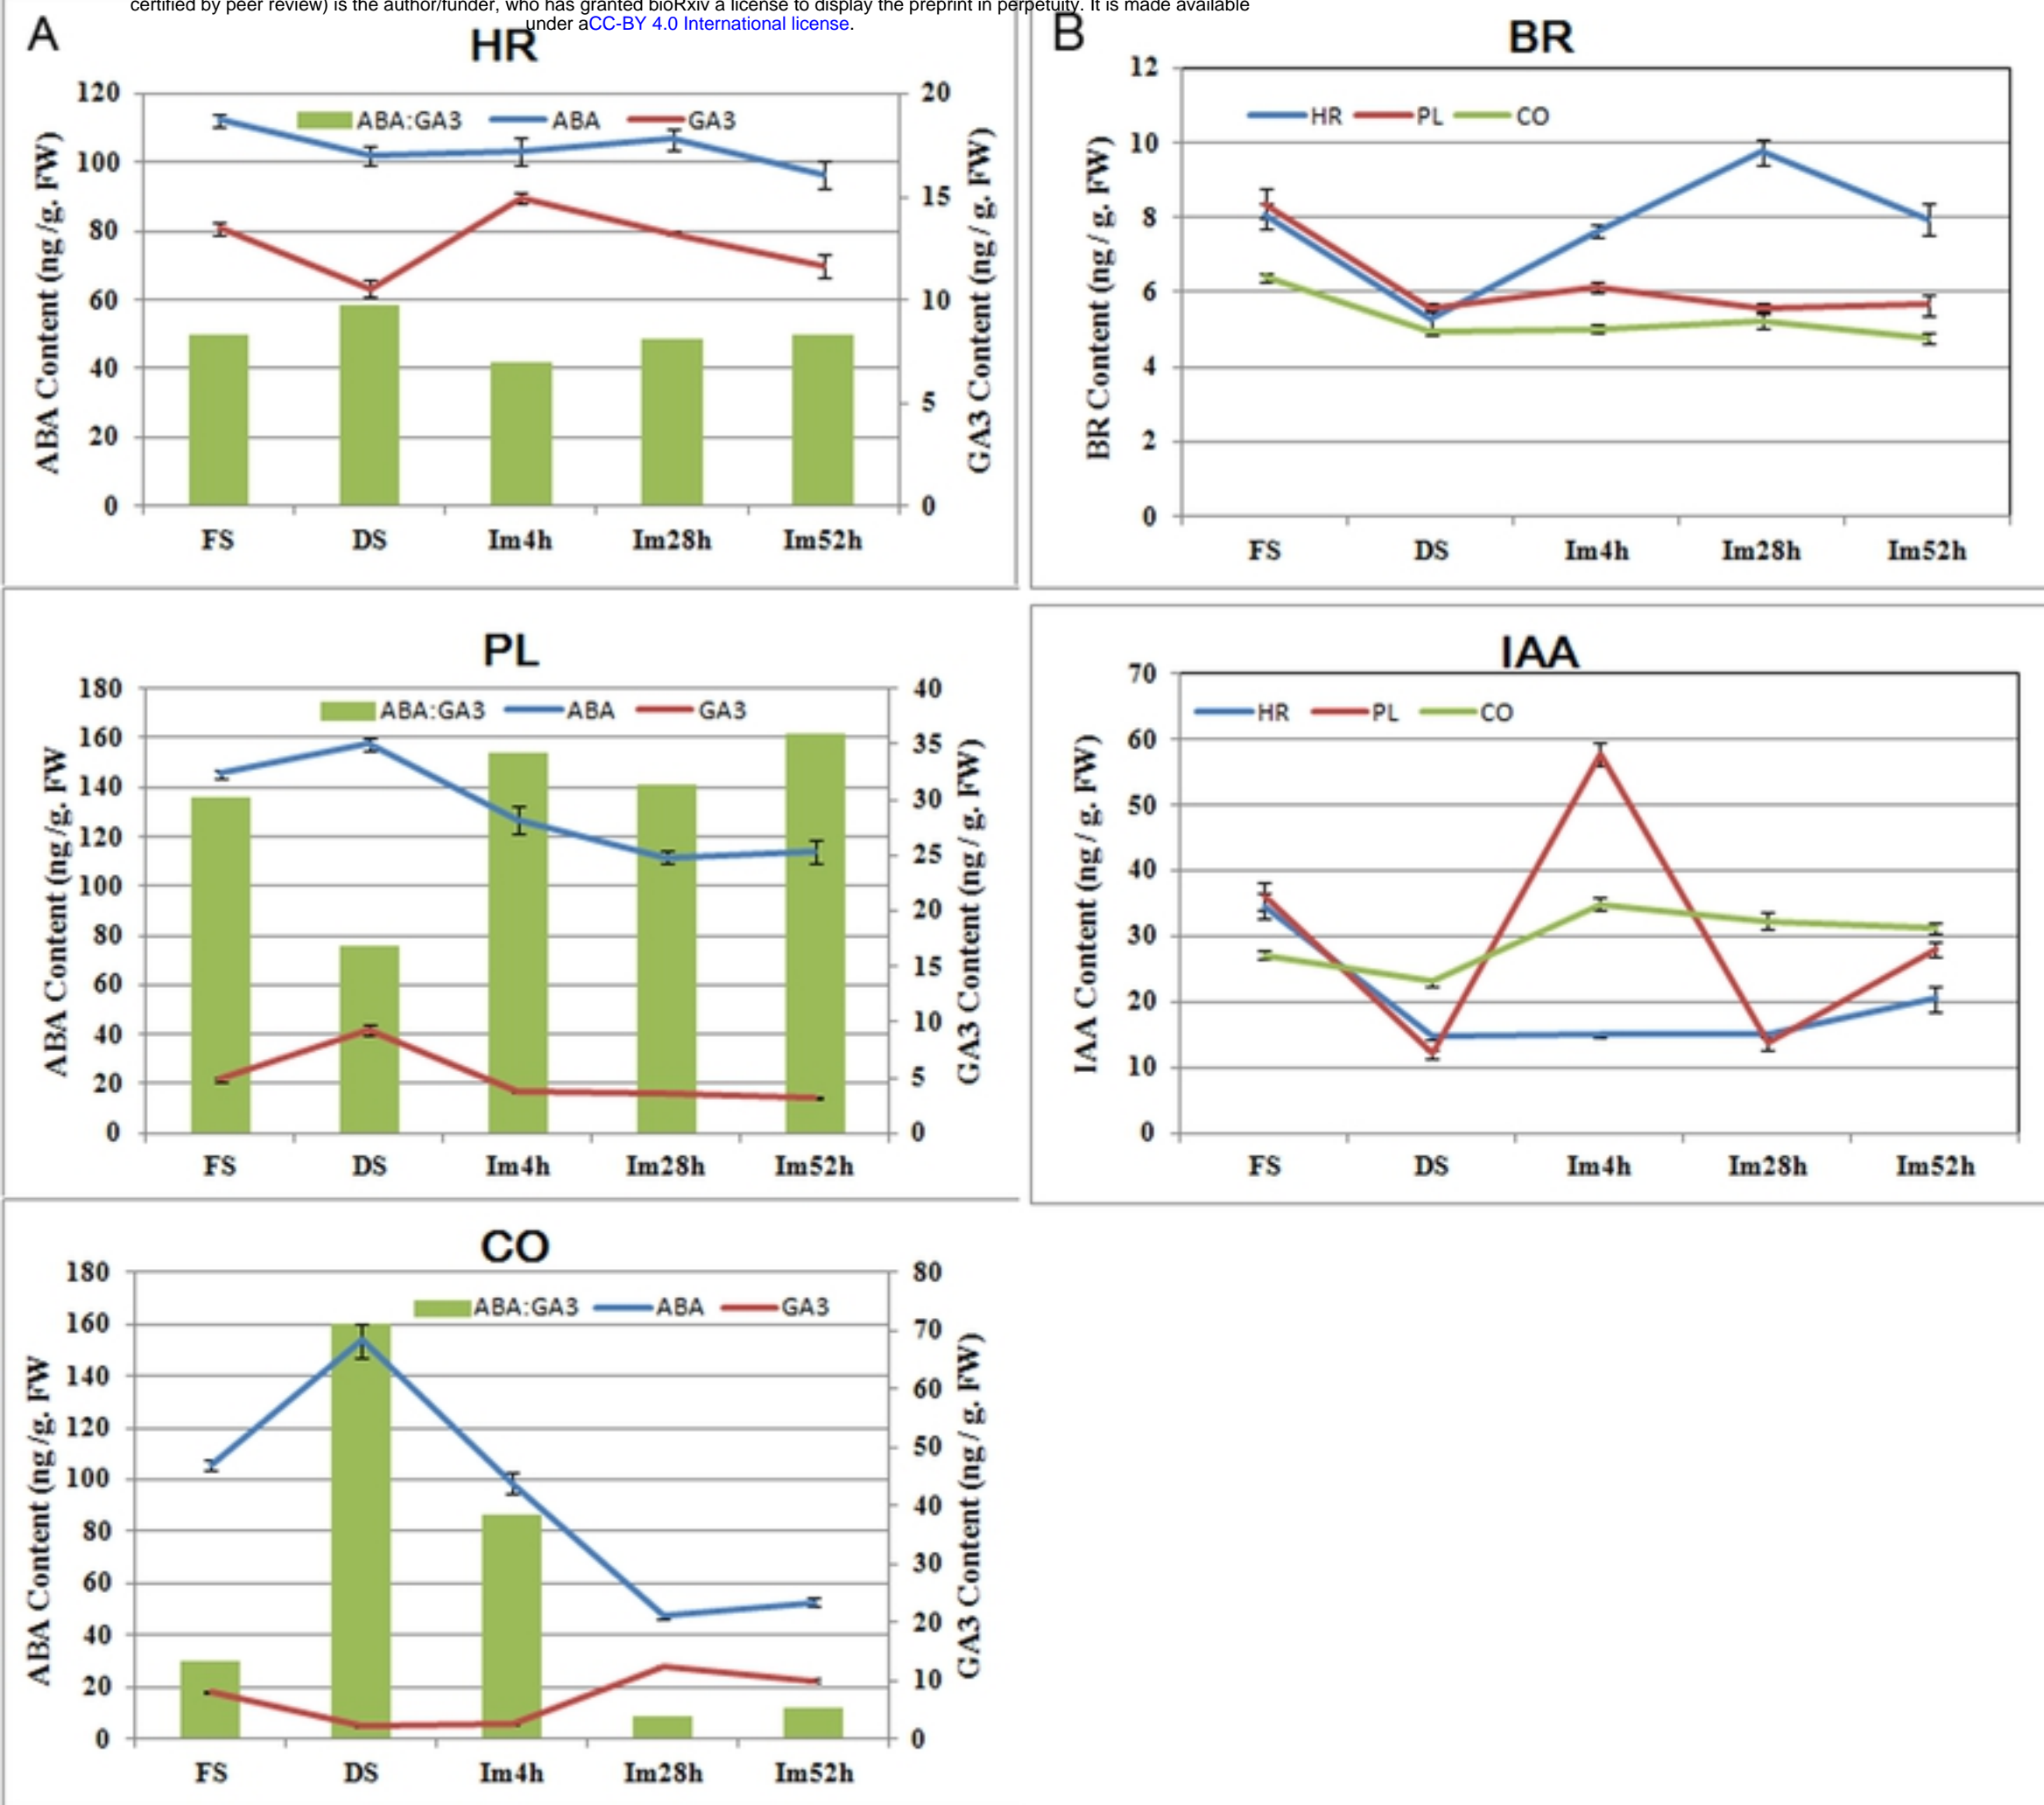

Figure8
